# Supplementary material for: Association of Sex and Race With Incident Peripheral Artery Disease Among Veterans With Normal Ankle-Brachial Indices
Source: PubMed Central journal article supplement (PMC9634499; doi:10.1001/jamanetworkopen.2022.40188), 2022-11-03
Supplement: jamanetwopen-e2240188-s001.pdf [file jamanetwopen-e2240188-s001.pdf]

## Supplemental Online Content

Aday AW, Duncan MS, Patterson OV, et al. Association of sex and race with incident peripheral artery disease among veterans with normal ankle-brachial indices. *JAMA Netw Open*. 2022;5(11):e2240188. doi:10.1001/jamanetworkopen.2022.40188

- eTable 1.** Diagnostic and Procedural Codes for Peripheral Artery Disease
- eTable 2.** Baseline Characteristics of Individuals Excluded From the Study
- eTable 3.** Procedural Codes for Lower-Extremity Amputation Due to Trauma or Non-Peripheral Artery Disease Indications
- eTable 4.** Association of Sex, Race, and Ethnicity With Peripheral Artery Disease Among Individuals Without Diabetes
- eTable 5.** Association of Sex, Race, and Ethnicity With Peripheral Artery Disease Among Individual Who Never Smoked
- eTable 6.** Association of Sex, Race, and Ethnicity With Peripheral Artery Disease Among Individuals Without Diabetes Who Never Smoked
- eTable 7.** Baseline Characteristics of Individuals Without Diabetes Who Never Smoked
- eTable 8.** Deaths During Follow-up by Sex, Race and Ethnicity, Diabetes, and Smoking
- eTable 9.** Association of Sex, Race and Ethnicity, Diabetes, and Smoking With Subsequent Ankle-Brachial Index Less Than 0.90
- eFigure 1.** Sample Derivation
- eFigure 2.** Cumulative Incidence of Peripheral Artery Disease by History of Diabetes
- eFigure 3.** Cumulative Incidence of Peripheral Artery Disease by Smoking History
- eFigure 4.** Distribution of Time to Incident Peripheral Artery Disease by Race

This supplemental material has been provided by the authors to give readers additional information about their work.

**eTable 1. Diagnostic and Procedural Codes fFor Peripheral Artery Disease**

| Description                                                            | ICD-9 Procedure Codes                                                       | CPT Codes                                                                                                                                                                                                 | ICD-10 Procedure Codes                                                                                                                                                                                                                                                                                                                                                                                                                                                                                                                                                                                                                                                                                                                                                                                                                                                                                                                                                                                                                                                                                                                                                                                                                                                                                                                                                                                                                                                                                                                                                                                                                                                                                                  |
|------------------------------------------------------------------------|-----------------------------------------------------------------------------|-----------------------------------------------------------------------------------------------------------------------------------------------------------------------------------------------------------|-------------------------------------------------------------------------------------------------------------------------------------------------------------------------------------------------------------------------------------------------------------------------------------------------------------------------------------------------------------------------------------------------------------------------------------------------------------------------------------------------------------------------------------------------------------------------------------------------------------------------------------------------------------------------------------------------------------------------------------------------------------------------------------------------------------------------------------------------------------------------------------------------------------------------------------------------------------------------------------------------------------------------------------------------------------------------------------------------------------------------------------------------------------------------------------------------------------------------------------------------------------------------------------------------------------------------------------------------------------------------------------------------------------------------------------------------------------------------------------------------------------------------------------------------------------------------------------------------------------------------------------------------------------------------------------------------------------------------|
| Lower Extremity Amputation                                             | 84.10, 84.11, 84.12, 84.13, 84.14, 84.15, 84.16, 84.17, 84.18, 84.19, 84.91 | 27295, 27590, 27591, 27592, 27598, 27880, 27881, 27882, 27888, 27889, 28800, 28805                                                                                                                        | 0Y6C0Z1, 0Y6C0Z2, 0Y6C0Z3, 0Y6D0Z1, 0Y6D0Z2, 0Y6D0Z3, 0Y6H0Z1, 0Y6H0Z2, 0Y6H0Z3, 0Y6J0Z1, 0Y6J0Z2, 0Y6J0Z3, 0Y6P0Z0, 0Y6P0Z10, Y6P0Z2, 0Y6P0Z3, 0Y6Q0Z0, 0Y6Q0Z1, 0Y6Q0Z2, 0Y6Q0Z3, 0Y6R0Z0, 0Y6R0Z1, 0Y6R0Z2, 0Y6R0Z3, 0Y6S0Z0, 0Y6S0Z1, 0Y6S0Z2, 0Y6S0Z3, 0Y6T0Z0, 0Y6T0Z1, 0Y6T0Z2, 0Y6T0Z3, 0Y6U0Z0, 0Y6U0Z1, 0Y6U0Z2, 0Y6U0Z3, 0Y6V0Z0, 0Y6V0Z1, 0Y6V0Z2, 0Y6V0Z3, 0Y6W0Z0, 0Y6W0Z1, 0Y6W0Z2, 0Y6W0Z3, 0Y6X0Z0, 0Y6X0Z1, 0Y6X0Z2, 0Y6X0Z3, 0Y6Y0Z0, 0Y6Y0Z1, 0Y6Y0Z2, 0Y6Y0Z3, 0Y6M0Z4, 0Y6M0Z5, 0Y6M0Z6, 0Y6M0Z7, 0Y6M0Z8, 0Y6M0Z9, 0Y6M0ZB, 0Y6M0ZC, 0Y6M0ZD, 0Y6M0ZF, 0Y6N0Z4, 0Y6N0Z5, 0Y6N0Z6, 0Y6N0Z7, 0Y6N0Z8, 0Y6N0Z9, 0Y6N0ZB, 0Y6N0ZC, 0Y6N0ZD, 0Y6N0ZF, 0Y6M0Z0, 0Y6N0Z0, 0Y6H0Z3, 0Y6J0Z3, 0Y6H0Z1, 0Y6H0Z2, 0Y6H0Z3, 0Y6J0Z1, 0Y6J0Z2, 0Y6J0Z3, 0Y6F0ZZ, 0Y6G0ZZ, 0Y6C0Z1, 0Y6C0Z2, 0Y6C0Z3, 0Y6D0Z1, 0Y6D0Z2, 0Y6D0Z3, 0Y670ZZ, 0Y680ZZ, 0Y620ZZ, 0Y630ZZ, 0Y640ZZ, 0Y620ZZ, 0Y630ZZ, 0Y640ZZ                                                                                                                                                                                                                                                                                                                                                                                                                                                                                                                                                                                                                                                                                                                                                                                                        |
| Lower Extremity Peripheral Angioplasty, Atherectomy, or Endarterectomy | 38.88, 39.50                                                                | 35302, 35303, 35304, 35305, 35306, 35331, 35351, 35355, 35361, 35363, 35371, 35372, 35381, 35452, 35454, 35456, 35459, 35470, 35472, 35473, 35474, 35481, 35482, 35483, 35485, 35491, 35492, 35493, 35495 | 04LK0CZ, 04LK0DZ, 04LK0ZZ, 04LK3CZ, 04LK3DZ, 04LK3ZZ, 04LK4CZ, 04LK4DZ, 04LK4ZZ, 04LL0CZ, 04LL0DZ, 04LL0ZZ, 04LL3CZ, 04LL3DZ, 04LL3ZZ, 04LL4CZ, 04LL4DZ, 04LL4ZZ, 04LM0CZ, 04LM0DZ, 04LM0ZZ, 04LM3CZ, 04LM3DZ, 04LM3ZZ, 04LM4CZ, 04LM4DZ, 04LM4ZZ, 04LN0CZ, 04LN0DZ, 04LN0ZZ, 04LN3CZ, 04LN3DZ, 04LN3ZZ, 04LN4CZ, 04LN4DZ, 04LN4ZZ, 04LP0CZ, 04LP0DZ, 04LP0ZZ, 04LP3CZ, 04LP3DZ, 04LP3ZZ, 04LP4CZ, 04LP4DZ, 04LP4ZZ, 04LQ0CZ, 04LQ0DZ, 04LQ0ZZ, 04LQ3CZ, 04LQ3DZ, 04LQ3ZZ, 04LQ4CZ, 04LQ4DZ, 04LQ4ZZ, 04LR0CZ, 04LR0DZ, 04LR0ZZ, 04LR3CZ, 04LR3DZ, 04LR3ZZ, 04LR4CZ, 04LR4DZ, 04LR4ZZ, 04LS0CZ, 04LS0DZ, 04LS0ZZ, 04LS3CZ, 04LS3DZ, 04LS3ZZ, 04LS4CZ, 04LS4DZ, 04LS4ZZ, 04LT0CZ, 04LT0DZ, 04LT0ZZ, 04LT3CZ, 04LT3DZ, 04LT3ZZ, 04LT4CZ, 04LT4DZ, 04LT4ZZ, 04LU0CZ, 04LU0DZ, 04LU0ZZ, 04LU3CZ, 04LU3DZ, 04LU3ZZ, 04LU4CZ, 04LU4DZ, 04LU4ZZ, 04LV0CZ, 04LV0DZ, 04LV0ZZ, 04LV3CZ, 04LV3DZ, 04LV3ZZ, 04LV4CZ, 04LV4DZ, 04LV4ZZ, 04LW0CZ, 04LW0DZ, 04LW0ZZ, 04LW3CZ, 04LW3DZ, 04LW3ZZ, 04LW4CZ, 04LW4DZ, 04LW4ZZ, 047C041, 047C04Z, 047C0D1, 047C0DZ, 047C0Z1, 047C0ZZ, 047C341, 047C34Z, 047C3D1, 047C3DZ, 047C3Z1, 047C3ZZ, 047C441, 047C44Z, 047C4D1, 047C4DZ, 047C4Z1, 047C4ZZ, 047D041, 047D04Z, 047D0D1, 047D0DZ, 047D0Z1, 047D0ZZ, 047D341, 047D34Z, 047D3D1, 047D3DZ, 047D3Z1, 047D3ZZ, 047D441, 047D44Z, 047D4D1, 047D4DZ, 047D4Z1, 047D4ZZ, 047E041, 047E04Z, 047E0D1, 047E0DZ, 047E0Z1, 047E0ZZ, 047E341, 047E34Z, 047E3D1, 047E3DZ, 047E3Z1, 047E3ZZ, 047E441, 047E44Z, 047E4D1, 047E4DZ, 047E4Z1, 047E4ZZ, 047F041, 047F04Z, 047F0D1, 047F0DZ, 047F0Z1, 047F0ZZ, 047F341, 047F34Z, 047F3D1, 047F3DZ, 047F3Z1, 047F3ZZ, 047F441, 047F44Z, 047F4D1, 047F4DZ, 047F4Z1, 047F4ZZ, 047H041, 047H04Z, 047H0D1, 047H0DZ, |

| Description                       | ICD-9 Procedure Codes | CPT Codes                                                                                         | ICD-10 Procedure Codes                                                                                                                                                                                                                                                                                                                                                                                                                                                                                                                                                                                                                                                                                                                                                                                                                                                                                                                                                                                                                                                                                                                                                                                                                                                                                                                                                                                                                                                                                                                                                                                                                                                                                                                                                                                                                                                                                                                                                                                                                                                                                                                                                                                |
|-----------------------------------|-----------------------|---------------------------------------------------------------------------------------------------|-------------------------------------------------------------------------------------------------------------------------------------------------------------------------------------------------------------------------------------------------------------------------------------------------------------------------------------------------------------------------------------------------------------------------------------------------------------------------------------------------------------------------------------------------------------------------------------------------------------------------------------------------------------------------------------------------------------------------------------------------------------------------------------------------------------------------------------------------------------------------------------------------------------------------------------------------------------------------------------------------------------------------------------------------------------------------------------------------------------------------------------------------------------------------------------------------------------------------------------------------------------------------------------------------------------------------------------------------------------------------------------------------------------------------------------------------------------------------------------------------------------------------------------------------------------------------------------------------------------------------------------------------------------------------------------------------------------------------------------------------------------------------------------------------------------------------------------------------------------------------------------------------------------------------------------------------------------------------------------------------------------------------------------------------------------------------------------------------------------------------------------------------------------------------------------------------------|
|                                   |                       |                                                                                                   | 047H0Z1, 047H0ZZ, 047H341, 047H34Z, 047H3D1, 047H3DZ, 047H3Z1, 047H3ZZ, 047H441, 047H44Z, 047H4D1, 047H4DZ, 047H4Z1, 047H4ZZ, 047J041, 047J04Z, 047J0D1, 047J0DZ, 047J0Z1, 047J0ZZ, 047J341, 047J34Z, 047J3D1, 047J3DZ, 047J3Z1, 047J3ZZ, 047J441, 047J44Z, 047J4D1, 047J4DZ, 047J4Z1, 047J4ZZ, 047K04Z, 047K0DZ, 047K0ZZ, 047K34Z, 047K3DZ, 047K3ZZ, 047K44Z, 047K4DZ, 047K4ZZ, 047L04Z,, 047L0ZZ, 047L34Z, 047L3DZ, 047L3ZZ, 047L44Z, 047L4DZ, 047L4ZZ, 047M04Z, 047M0DZ, 047M0ZZ, 047M34Z, 047M3DZ, 047M3ZZ, 047M44Z, 047M4DZ, 047M4ZZ, 047N04Z, 047N0DZ, 047N0ZZ, 047N34Z, 047N3DZ, 047N3ZZ, 047N44Z, 047N4DZ, 047N4ZZ, 047N04Z, 047N0DZ, 047N0ZZ, 047N34Z, 047N3DZ, 047N3ZZ, 047N44Z, 047N4DZ, 047N4ZZ, 047P041, 047P04Z, 047P0D1, 047P0DZ, 047P0Z1, 047P0ZZ, 047P341, 047P34Z, 047P3D1, 047P3DZ, 047P3Z1, 047P3ZZ, 047P441, 047P44Z, 047P4D1, 047P4DZ, 047P4Z1, 047P4ZZ, 047Q041, 047Q04Z, 047Q0D1, 047Q0DZ, 047Q0Z1, 047Q0ZZ, 047Q341, 047Q34Z, 047Q3D1, 047Q3DZ, 047Q3Z1, 047Q3ZZ, 047Q441, 047Q44Z, 047Q4D1, 047Q4DZ, 047Q4Z1, 047Q4ZZ, 047R041, 047R04Z, 047R0D1, 047R0DZ, 047R0Z1, 047R0ZZ, 047R34Z, 047R3D1, 047R3DZ, 047R3Z1, 047R3ZZ, 047R441, 047R44Z, 047R4D1, 047R4DZ, 047R4Z1, 047R4ZZ, 047S041, 047S04Z, 047S0D1, 047S0DZ, 047S0Z1, 047S0ZZ, 047S341, 047S34Z, 047S3D1, 047S3DZ, 047S3Z1, 047S3ZZ,, 047S441, 047S44Z, 047S4D1, 047S4DZ, 047S4Z1, 047S4ZZ, 047T041, 047T04Z, 047T0D1, 047T0DZ, 047T0Z1, 047T0ZZ, 047T341, 047T34Z, 047T3D1, 047T3DZ, 047T3Z1, 047T3ZZ, 047T441, 047T44Z,, 047T4DZ, 047T4Z1, 047T4ZZ, 047U041, 047U04Z, 047U0D1,, 047U0Z1, 047U0ZZ, 047U341, 047U34Z, 047U3D1, 047U3DZ, 047U3Z1, 047U3ZZ, 047U441, 047U44Z, 047U4D1, 047U4DZ, 047U4Z1, 047U4ZZ, 047V041, 047V04Z, 047V0D1, 047V0DZ, 047V0Z1, 047V0ZZ, 047V341, 047V34Z, 047V3D1, 047V3DZ, 047V3Z1, 047V3ZZ, 047V441, 047V44Z, 047V4D1, 047V4DZ, 047V4Z1, 047V4ZZ, 047W041, 047W04Z, 047W0D1, 047W0DZ, 047W0Z1, 047W0ZZ, 047W341, 047W34Z, 047W3D1, 047W3DZ, 047W3Z1, 047W3ZZ, 047W441, 047W44Z, 047W4D1, 047W4DZ, 047W4Z1, 047W4ZZ, 047Y041, 047Y04Z, 047Y0D1, 047Y0DZ, 047Y0Z1, 047Y0ZZ, 047Y341, 047Y34Z, 047Y3D1, 047Y3DZ, 047Y3Z1, 047Y3ZZ, 047Y441, 047Y44Z, 047Y4D1, 047Y4DZ, 047Y4Z1, 047Y4ZZ |
| Lower Extremity Peripheral Bypass | 39.25, 39.29          | 35521, 35533, 35537, 35538, 35539, 35540, 35541, 35546, 35548, 35549, 35551, 35556, 35558, 35563, | 0410096, 0410097, 0410098, 0410099, 041009B, 041009C, 041009D, 041009F, 041009G, 041009H, 041009J, 041009K, 041009Q, 041009R, 04100A6, 04100A7, 04100A8, 04100A9, 04100AB, 04100AC, 04100AD, 04100AF, 04100AG, 04100AH, 04100AJ, 04100AK, 04100AQ, 04100AR, 04100J6, 04100J7, 04100J8, 04100J9, 04100JB, 04100JC, 04100JD, 04100JF, 04100JG, 04100JH, 04100JJ, 04100JK, 04100JQ, 04100JR, 04100K6, 04100K7, 04100K8, 04100K9, 04100KB, 04100KC, 04100KD, 04100KF, 04100KG, 04100KH, 04100KJ, 04100KK, 04100KQ, 04100KR, 04100Z6, 04100Z7, 04100Z8,                                                                                                                                                                                                                                                                                                                                                                                                                                                                                                                                                                                                                                                                                                                                                                                                                                                                                                                                                                                                                                                                                                                                                                                                                                                                                                                                                                                                                                                                                                                                                                                                                                                    |

| Description | ICD-9 Procedure Codes | CPT Codes                                                                                                                                                | ICD-10 Procedure Codes                                                                                                                                                                                                                                                                                                                                                                                                                                                                                                                                                                                                                                                                                                                                                                                                                                                                                                                                                                                                                                                                                                                                                                                                                                                                                                                                                                                                                                                                                                                                                                                                                                                                                                                                                                                                                                                                                                                                                                                                                                                                                                                                                                                                                                                                                                                                                                                                                                                                                                                                                                                                                                                                                                                                                                                                                 |
|-------------|-----------------------|----------------------------------------------------------------------------------------------------------------------------------------------------------|----------------------------------------------------------------------------------------------------------------------------------------------------------------------------------------------------------------------------------------------------------------------------------------------------------------------------------------------------------------------------------------------------------------------------------------------------------------------------------------------------------------------------------------------------------------------------------------------------------------------------------------------------------------------------------------------------------------------------------------------------------------------------------------------------------------------------------------------------------------------------------------------------------------------------------------------------------------------------------------------------------------------------------------------------------------------------------------------------------------------------------------------------------------------------------------------------------------------------------------------------------------------------------------------------------------------------------------------------------------------------------------------------------------------------------------------------------------------------------------------------------------------------------------------------------------------------------------------------------------------------------------------------------------------------------------------------------------------------------------------------------------------------------------------------------------------------------------------------------------------------------------------------------------------------------------------------------------------------------------------------------------------------------------------------------------------------------------------------------------------------------------------------------------------------------------------------------------------------------------------------------------------------------------------------------------------------------------------------------------------------------------------------------------------------------------------------------------------------------------------------------------------------------------------------------------------------------------------------------------------------------------------------------------------------------------------------------------------------------------------------------------------------------------------------------------------------------------|
|             |                       | 35565, 35566, 35571, 35582, 35583, 35585, 35587, 35621, 35623, 35637, 35638, 35641, 35646, 35647, 35651, 35654, 35656, 35661, 35663, 35665, 35666, 35671 | 04100Z9, 04100ZB, 04100ZC, 04100ZD, 04100ZF, 04100ZG, 04100ZH, 04100ZJ, 04100ZK, 04100ZQ, 04100ZR, 0410496, 0410497, 0410498, 0410499, 041049B, 041049C, 041049D, 041049F, 041049G, 041049H, 041049J, 041049K, 041049Q, 041049R, 04104A6, 04104A7, 04104A8, 04104AA, 04104AB, 04104AC, 04104AD, 04104AF, 04104AG, 04104AH, 04104AJ, 04104AK, 04104AQ, 04104AR, 04100ZR, 04104J6, 04104J7, 04104J8, 04104JJ, 04104JB, 04104JC, 04104JD, 04104JF, 04104JG, 04104JH, 04104JJ, 04104JK, 04104JQ, 04104JR, 04100ZR, 04104K6, 04104K7, 04104K8, 04104KK, 04104KB, 04104KC, 04104KD, 04104KF, 04104KG, 04104KH, 04104KJ, 04104KK, 04104KQ, 04104KR, 04100ZR, 04104Z6, 04104Z7, 04104Z8, 04104ZZ, 04104ZB, 04104ZC, 04104ZD, 04104ZF, 04104ZG, 04104ZH, 04104ZJ, 04104ZK, 04104ZQ, 04104ZR, 041C09H, 041C09J, 041C09K, 041C0AH, 041C0AJ, 041C0AK, 041C0JH, 041C0JJ, 041C0JK, 041C0KH, 041C0KJ, 041C0KK, 041C0ZH, 041C0ZJ, 041C0ZK, 041C49H, 041C49J, 041C49K, 041C4AH, 041C4AJ, 041C4AK, 041C4JH, 041C4JJ, 041C4JK, 041C4KH, 041C4KJ, 041C4KK, 041C4ZH, 041C4ZJ, 041C4ZK, 041D09H, 041D09J, 041D09K, 041D0AH, 041D0AJ, 041D0AK, 041D0JH, 041D0JK, 041D0KH, 041D0KJ, 041D0KK, 041D0ZH, 041D0ZJ, 041D0ZK, 041D49H, 041D49J, 041D49K, 041D4AH, 041D4AJ, 041D4AK, 041D4JH, 041D4JJ, 041D4JK, 041D4KH, 041D4KJ, 041D4KK, 041D4ZH, 041D4ZJ, 041D4ZK, 041E09H, 041E09J, 041E09K, 041E0AH, 041E0AJ, 041E0AK, 041E0JH, 041E0JJ, 041E0JK, 041E0KH, 041E0KJ, 041E0KK, 041E0ZH, 041E0ZJ, 041E0ZK, 041E49H, 041E49J, 041E49K, 041E4AH, 041E4AJ, 041E4AK, 041E4JH, 041E4JJ, 041E4JK, 041E4KH, 041E4KJ, 041E4KK, 041E4ZH, 041E4ZJ, 041E4ZK, 041F09H, 041F09J, 041F09K, 041F0AH, 041F0AJ, 041F0AK, 041F0JH, 041F0JJ, 041F0JK, 041F0KH, 041F0KJ, 041F0KK, 041F0ZH, 041F0ZJ, 041F0ZK, 041F49H, 041F49J, 041F49K, 041F4AH, 041F4AJ, 041F4AK, 041F4JH, 041F4JJ, 041F4JK, 041F4KH, 041F4KJ, 041F4KK, 041F4ZH, 041F4ZJ, 041F4ZK, 041H09H, 041H09J, 041H09K, 041H0AH, 041H0AJ, 041H0AK, 041H0JH, 041H0JJ, 041H0JK, 041H0KH, 041H0KJ, 041H0KK, 041H0ZH, 041H0ZJ, 041H0ZK, 041H49H, 041H49J, 041H49K, 041H4AH, 041H4AJ, 041H4AK, 041H4JH, 041H4JJ, 041H4JK, 041H4KH, 041H4KJ, 041H4KK, 041H4ZH, 041H4ZJ, 041H4ZK, 041J09H, 041J09J, 041J09K, 041J0AH, 041J0AJ, 041J0AK, 041J0JH, 041J0JJ, 041J0JK, 041J0KH, 041J0KJ, 041J0KK, 041J0ZH, 041J0ZJ, 041J0ZK, 041J49H, 041J49J, 041J49K, 041J4AH, 041J4AJ, 041J4AK, 041J4JH, 041J4JJ, 041J4JK, 041J4KH, 041J4KJ, 041J4KK, 041J4ZH, 041J4ZJ, 041J4ZK, 0312095, 0312096, 0312097, 0312098, 0312099, 031209B, 031209C, 03120A6, 03120A7, 03120A8, 03120A9, 03120AB, 03120AC, 03120J6, 03120J7, 03120J8, 03120J9, 03120JB, 03120JC, 03120K6, 03120K7, 03120K8, 03120K9, 03120KB, 03120KC, 03120Z6, 03120Z7, 03120Z8, 03120Z9, 03120ZB, 03120ZC, 0313096, 0313097, 0313098, 0313099, 031309B, 031309C, 03130A6, 03130A7, 03130A8, |

| Description | ICD-9 Procedure Codes | CPT Codes | ICD-10 Procedure Codes                                                                                                                                                                                                                                                                                                                                                                                                                                                                                                                                                                                                                                                                                                                                                                                                                                                                                                                                                                                                                                                                                                                                                                                                                                                                                                                                                                                                                                                                                                                                                                                                                                                                                                                                                                                                                                                                                                                                                                                                                                                                                                                                                                                                                                                                                                                                                                                                                                                                                                                                                                                                                                                                                                                                                                                                                          |
|-------------|-----------------------|-----------|-------------------------------------------------------------------------------------------------------------------------------------------------------------------------------------------------------------------------------------------------------------------------------------------------------------------------------------------------------------------------------------------------------------------------------------------------------------------------------------------------------------------------------------------------------------------------------------------------------------------------------------------------------------------------------------------------------------------------------------------------------------------------------------------------------------------------------------------------------------------------------------------------------------------------------------------------------------------------------------------------------------------------------------------------------------------------------------------------------------------------------------------------------------------------------------------------------------------------------------------------------------------------------------------------------------------------------------------------------------------------------------------------------------------------------------------------------------------------------------------------------------------------------------------------------------------------------------------------------------------------------------------------------------------------------------------------------------------------------------------------------------------------------------------------------------------------------------------------------------------------------------------------------------------------------------------------------------------------------------------------------------------------------------------------------------------------------------------------------------------------------------------------------------------------------------------------------------------------------------------------------------------------------------------------------------------------------------------------------------------------------------------------------------------------------------------------------------------------------------------------------------------------------------------------------------------------------------------------------------------------------------------------------------------------------------------------------------------------------------------------------------------------------------------------------------------------------------------------|
|             |                       |           | 03130A9, 03130AB, 03130AC, 03130J6, 03130J7, 03130J8, 03130J9, 03130JB, 03130JC, 03130K6, 03130K7, 03130K8, 03130K9, 03130KB, 03130KC, 03130Z6, 03130Z7, 03130Z8, 03130Z9, 03130ZB, 03130ZC, 0314096, 0314097, 0314098, 0314099, 031409B, 031409C, 03140A6, 03140A7, 03140A8, 03140A9, 03140AB, 03140AC, 03140J6, 03140J7, 03140J8, 03140J9, 03140JB, 03140JC, 03140K6, 03140K7, 03140K8, 03140K9, 03140KB, 03140KC, 03140Z6, 03140Z7, 03140Z8, 03140Z9, 03140ZB, 03140ZC, 0315096, 0315097, 0315098, 0315099, 031509B, 031509C, 03150A6, 03150A7, 03150A8, 03150A9, 03150AB, 03150AC, 03150J6, 03150J7, 03150J8, 03150J9, 03150JB, 03150JC, 03150K6, 03150K7, 03150K8, 03150K9, 03150KB, 03150KC, 03150Z6, 03150Z7, 03150Z8, 03150Z9, 03150ZB, 03150ZC, 0316096, 0316097, 0316098, 0316099, 031609B, 031609C, 03160A6, 03160A7, 03160A8, 03160A9, 03160AB, 03160AC, 03160J6, 03160J7, 03160J8, 03160J9, 03160JB, 03160JC, 03160K6, 03160K7, 03160K8, 03160K9, 03160KB, 03160KC, 03160Z6, 03160Z7, 03160Z8, 03160Z9, 03160ZB, 03160ZC, 041K09H, 041K09J, 041K09K, 041K09L, 041K09M, 041K09N, 041K09P, 041K09Q, 041K09S, 041K0AH, 041K0AJ, 041K0AK, 041K0AL, 041K0AM, 041K0AN, 041K0AP, 041K0AQ, 041K0AS, 041K0JH, 041K0JJ, 041K0JK, 041K0JL, 041K0JM, 041K0JN, 041K0JP, 041K0JQ, 041K0JS, 041K0KH, 041K0KJ, 041K0KK, 041K0KL, 041K0KM, 041K0KN, 041K0KP, 041K0KQ, 041K0KS, 041K0ZH, 041K0ZJ, 041K0ZK, 041K0ZL, 041K0ZM, 041K0ZN, 041K0ZP, 041K0ZQ, 041K0ZS, 041K49H, 041K49J, 041K49K, 041K49L, 041K49M, 041K49N, 041K49P, 041K49Q, 041K49S, 041K4AH, 041K4AJ, 041K4AK, 041K4AL, 041K4AM, 041K4AN, 041K4AP, 041K4AQ, 041K4AS, 041K4JH, 041K4JJ, 041K4JK, 041K4JL, 041K4JM, 041K4JN, 041K4JP, 041K4JQ, 041K4JS, 041K4KH, 041K4KJ, 041K4KK, 041K4KL, 041K4KM, 041K4KN, 041K4KP, 041K4KQ, 041K4KS, 041K4ZH, 041K4ZJ, 041K4ZK, 041K4ZL, 041K4ZM, 041K4ZN, 041K4ZP, 041K4ZQ, 041K4ZS, 041L09H, 041L09J, 041L09K, 041L09L, 041L09M, 041L09N, 041L09P, 041L09Q, 041L09S, 041L0AH, 041L0AJ, 041L0AK, 041L0AL, 041L0AM, 041L0AN, 041L0AP, 041L0AQ, 041L0AS, 041L0JH, 041L0JJ, 041L0JK, 041L0JL, 041L0JM, 041L0JN, 041L0JP, 041L0JQ, 041L0JS, 041L0KH, 041L0KJ, 041L0KK, 041L0KL, 041L0KM, 041L0KN, 041L0KP, 041L0KQ, 041L0KS, 041L0ZH, 041L0ZJ, 041L0ZK, 041L0ZL, 041L0ZM, 041L0ZN, 041L0ZP, 041L0ZQ, 041L0ZS, 041L49H, 041L49J, 041L49K, 041L49L, 041L49M, 041L49N, 041L49P, 041L49Q, 041L49S, 041L4AH, 041L4AJ, 041L4AK, 041L4AL, 041L4AM, 041L4AN, 041L4AP, 041L4AQ, 041L4AS, 041L4JH, 041L4JJ, 041L4JK, 041L4JL, 041L4JM, 041L4JN, 041L4JP, 041L4JQ, 041L4JS, 041L4KH, 041L4KJ, 041L4KK, 041L4KL, 041L4KM, 041L4KN, 041L4KP, 041L4KQ, 041L4KS, 041L4ZH, 041L4ZJ, 041L4ZK, 041L4ZL, 041L4ZM, 041L4ZN, 041L4ZP, 041L4ZQ, 041L4ZS, 041M09L, 041M09M, 041M09P, 041M09Q, 041M09S, 041M0AL, 041M0AM, 041M0AP, 041M0AQ, 041M0AS, 041M0JL, 041M0JM, 041M0JP, |

| Description                                                                                    | ICD-9 Procedure Codes                           | CPT Codes                                                                   | ICD-10 Procedure Codes                                                                                                                                                                                                                                                                                                                                                                                                                                                                                                                                                                                                                                                                                                                                                                                                                                                                                                                                                                                                                                                                                                                                                                                                                                                                                                                                                                                                                                                                                                                                                                                                                                                                                                                                                                                                                                                                                              |
|------------------------------------------------------------------------------------------------|-------------------------------------------------|-----------------------------------------------------------------------------|---------------------------------------------------------------------------------------------------------------------------------------------------------------------------------------------------------------------------------------------------------------------------------------------------------------------------------------------------------------------------------------------------------------------------------------------------------------------------------------------------------------------------------------------------------------------------------------------------------------------------------------------------------------------------------------------------------------------------------------------------------------------------------------------------------------------------------------------------------------------------------------------------------------------------------------------------------------------------------------------------------------------------------------------------------------------------------------------------------------------------------------------------------------------------------------------------------------------------------------------------------------------------------------------------------------------------------------------------------------------------------------------------------------------------------------------------------------------------------------------------------------------------------------------------------------------------------------------------------------------------------------------------------------------------------------------------------------------------------------------------------------------------------------------------------------------------------------------------------------------------------------------------------------------|
|                                                                                                |                                                 |                                                                             | 041M0JQ, 041M0JS, 041M0KL, 041M0KM, 041M0KP, 041M0KQ, 041M0KS, 041M0ZL, 041M0ZM, 041M0ZP, 041M0ZQ, 041M0ZS, 041M49L, 041M49M, 041M49P, 041M49Q, 041M49S, 041M4AL, 041M4AM, 041M4AP, 041M4AQ, 041M4AS, 041M4JL, 041M4JM, 041M4JP, 041M4JQ, 041M4JS, 041M4KL, 041M4KM, 041M4KP, 041M4KQ, 041M4KS, 041M4ZL, 041M4ZM, 041M4ZP, 041M4ZQ, 041M4ZS, 041N09L, 041N09M, 041N09P, 041N09Q, 041N09S, 041N0AL, 041N0AM, 041N0AP, 041N0AQ, 041N0AS, 041N0JL, 041N0JM, 041N0JP, 041N0JQ, 041N0JS, 041N0KL, 041N0KM, 041N0KP, 041N0KQ, 041N0KS, 041N0ZL, 041N0ZM, 041N0ZP, 041N0ZQ, 041N0ZS, 041N49L, 041N49M, 041N49P, 041N49Q, 041N49S, 041N4AL, 041N4AM, 041N4AP, 041N4AQ, 041N4AS, 041N4JL, 041N4JM, 041N4JP, 041N4JQ, 041N4JS, 041N4KL, 041N4KM, 041N4KP, 041N4KQ, 041N4KS, 041N4ZL, 041N4ZM, 041N4ZP, 041N4ZQ, 041N4ZS, 041T09P, 041T09Q, 041T09S, 041T0AP, 041T0AQ, 041T0AS, 041T0JP, 041T0JQ, 041T0JS, 041T0KP, 041T0KQ, 041T0KS, 041T0ZP, 041T0ZQ, 041T0ZS, 041T49P, 041T49Q, 041T49S, 041T4AP, 041T4AQ, 041T4AS, 041T4JP, 041T4JQ, 041T4JS, 041T4KP, 041T4KQ, 041T4KS, 041T4ZP, 041T4ZQ, 041T4ZS, 041U09P, 041U09Q, 041U09S, 041U0AP, 041U0AQ, 041U0AS, 041U0JP, 041U0JQ, 041U0JS, 041U0KP, 041U0KQ, 041U0KS, 041U0ZP, 041U0ZQ, 041U0ZS, 041U49P, 041U49Q, 041U49S, 041U4AP, 041U4AQ, 041U4AS, 041U4JP, 041U4JQ, 041U4JS, 041U4KP, 041U4KQ, 041U4KS, 041U4ZP, 041U4ZQ, 041U4ZS, 041V09P, 041V09Q, 041V09S, 041V0AP, 041V0AQ, 041V0AS, 041V0JP, 041V0JQ, 041V0JS, 041V0KP, 041V0KQ, 041V0KS, 041V0ZP, 041V0ZQ, 041V0ZS, 041V49P, 041V49Q, 041V49S, 041V4AP, 041V4AQ, 041V4AS, 041V4JP, 041V4JQ, 041V4JS, 041V4KP, 041V4KQ, 041V4KS, 041V4ZQ, 041V4ZS, 041W09P, 041W09Q, 041W09S, 041W0AP, 041W0AQ, 041W0AS, 041W0JP, 041W0JQ, 041W0JS, 041W0KP, 041W0KQ, 041W0KS, 041W0ZP, 041W0ZQ, 041W49P, 041W49Q, 041W49S, 041W4AP, 041W4AQ, 041W4AS, 041W4JP, 041W4JQ, 041W4JS, 041W4KP, 041W4KQ, 041W4KS, 041W4ZP, 041W4ZQ, 041W4ZS |
| Repair, Exploration, Revision, Resection of Lower Extremity Arteries, or Thrombectomy of Graft | 38.08, 38.38, 38.48, 39.49, 39.56, 39.57, 39.58 | 35226, 35256, 35286, 35700, 35721, 35741, 35876, 35879, 35881, 35883, 35884 | 04CK0ZZ, 04CK4ZZ, 04CL0ZZ, 04CL4ZZ, 04CM0ZZ, 04CM4ZZ, 04CN0ZZ, 04CN4ZZ, 04CP0ZZ, 04CP4ZZ, 04CQ0ZZ, 04CQ4ZZ, 04CR0ZZ, 04CR4ZZ, 04CS0ZZ, 04CS4ZZ, 04CT0ZZ, 04CT4ZZ, 04CU0ZZ, 04CU4ZZ, 04CV0ZZ, 04CV4ZZ, 04CW0ZZ, 04CW4ZZ, 04CY0ZZ, 04CY4ZZ, 04HY0ZZ, 04HY4ZZ, 04PY0YZ, 04PY3YZ, 04PY4YZ, 04WY0YZ, 04WY3YZ, 04WY4YZ, 04BK0ZZ, 04BK4ZZ, 04BL0ZZ, 04BL4ZZ, 04BM0ZZ, 04BM4ZZ, 04BN0ZZ, 04BN4ZZ, 04BP0ZZ, 04BP4ZZ, 04BQ0ZZ, 04BQ4ZZ, 04BR0ZZ, 04BR4ZZ, 04BS0ZZ, 04BS4ZZ, 04BT0ZZ, 04BT4ZZ, 04BU0ZZ, 04BU4ZZ, 04BV0ZZ, 04BV4ZZ, 04BW0ZZ, 04BW4ZZ, 04BY0ZZ, 04BY4ZZ, 04RK0ZZ, 04RK4ZZ, 04RL0ZZ, 04RL4ZZ, 04RM0ZZ, 04RM4ZZ, 04RN0ZZ, 04RN4ZZ, 04RP0ZZ, 04RP4ZZ, 04RN0KZ, 04RN4KZ, 04RP0KZ, 04RP4KZ,                                                                                                                                                                                                                                                                                                                                                                                                                                                                                                                                                                                                                                                                                                                                                                                                                                                                                                                                                                                                                                                                                                                                                                                                                           |

| Description                                                                      | ICD-9 Procedure Codes | CPT Codes                                       | ICD-10 Procedure Codes                                                                                                                                                                                                                                                                                                                                                                                                                                                                                                                                                                                                                                                                                                                                                                                                                                                                                                                                                                                                                                                                                                                                                                                                                                                                                                                                                                                                                                                                                                                                                                                                                                                                                                                                                                                                                                                                                                                                                                                                                                                                                                                                                                                                                                                                      |
|----------------------------------------------------------------------------------|-----------------------|-------------------------------------------------|---------------------------------------------------------------------------------------------------------------------------------------------------------------------------------------------------------------------------------------------------------------------------------------------------------------------------------------------------------------------------------------------------------------------------------------------------------------------------------------------------------------------------------------------------------------------------------------------------------------------------------------------------------------------------------------------------------------------------------------------------------------------------------------------------------------------------------------------------------------------------------------------------------------------------------------------------------------------------------------------------------------------------------------------------------------------------------------------------------------------------------------------------------------------------------------------------------------------------------------------------------------------------------------------------------------------------------------------------------------------------------------------------------------------------------------------------------------------------------------------------------------------------------------------------------------------------------------------------------------------------------------------------------------------------------------------------------------------------------------------------------------------------------------------------------------------------------------------------------------------------------------------------------------------------------------------------------------------------------------------------------------------------------------------------------------------------------------------------------------------------------------------------------------------------------------------------------------------------------------------------------------------------------------------|
|                                                                                  |                       |                                                 | 04RP4JZ, 04RP4KZ, 04RQ07Z, 04RQ0JZ, 04RQ0KZ, 04RQ47Z, 04RQ4JZ, 04RQ4KZ, 04RR07Z, 04RR0JZ, 04RR0KZ, 04RR47Z, 04RR4JZ, 04RR4KZ, 04RS07Z, 04RS0JZ, 04RS0KZ, 04RS47Z, 04RS4JZ, 04RS4KZ, 04RT07Z, 04RT0JZ, 04RT0KZ, 04RT47Z, 04RT4JZ, 04RT4KZ, 04RU07Z, 04RU0JZ, 04RU0KZ, 04RU47Z, 04RU4JZ, 04RU4KZ, 04RV07Z, 04RV0JZ, 04RV0KZ, 04RV47Z, 04RV4JZ, 04RV4KZ, 04RW07Z, 04RW0JZ, 04RW0KZ, 04RW47Z, 04RW4JZ, 04RW4KZ, 04RY07Z, 04RY0JZ, 04RY0KZ, 04RY47Z, 04RY4JZ, 04RY4KZ, 03CY0ZZ, 03CY3ZZ, 03CY4ZZ, 03QY0ZZ, 03QY3ZZ, 03QY4ZZ, 04CY0ZZ, 04CY3ZZ, 04CY4ZZ, 04QY0ZZ, 04QY3ZZ, 04QY4ZZ, 05CY0ZZ, 05CY3ZZ, 05CY4ZZ, 05QY0ZZ, 05QY3ZZ, 05QY4ZZ, 06CY0ZZ, 06CY3ZZ, 06CY4ZZ, 06QY0ZZ, 06QY3ZZ, 06QY4ZZ, 04UC07Z, 04UC37Z, 04UC47Z, 04UD07Z, 04UD37Z, 04UD47Z, 04UE07Z, 04UE37Z, 04UE47Z, 04UF07Z, 04UF37Z, 04UF47Z, 04UH07Z, 04UH37Z, 04UH47Z, 04UJ07Z, 04UJ37Z, 04UJ47Z, 04UK07Z, 04UK37Z, 04UK47Z, 04UL07Z, 04UL37Z, 04UL47Z, 04UM07Z, 04UM37Z, 04UM47Z, 04UN07Z, 04UN37Z, 04UN47Z, 04UP07Z, 04UP37Z, 04UP47Z, 04UQ07Z, 04UQ37Z, 04UQ47Z, 04UR07Z, 04UR37Z, 04UR47Z, 04US07Z, 04US37Z, 04US47Z, 04UT07Z, 04UT37Z, 04UT47Z, 04UU07Z, 04UU37Z, 04UU47Z, 04UV07Z, 04UV37Z, 04UV47Z, 04UW07Z, 04UW37Z, 04UW47Z, 04UY07Z, 04UY37Z, 04UY47Z, 04UC0JZ, 04UC3JZ, 04UC4JZ, 04UD0JZ, 04UD3JZ, 04UD4JZ, 04UE0JZ, 04UE3JZ, 04UE4JZ, 04UF0JZ, 04UF3JZ, 04UF4JZ, 04UH0JZ, 04UH3JZ, 04UH4JZ, 04UJ0JZ, 04UJ3JZ, 04UJ4JZ, 04UK0JZ, 04UK3JZ, 04UK4JZ, 04UL0JZ, 04UL3JZ, 04UL4JZ, 04UM0JZ, 04UM3JZ, 04UM4JZ, 04UN0JZ, 04UN3JZ, 04UN4JZ, 04UP0JZ, 04UP3JZ, 04UP4JZ, 04UQ0JZ, 04UQ3JZ, 04UQ4JZ, 04UR0JZ, 04UR3JZ, 04UR4JZ, 04US0JZ, 04US3JZ, 04US4JZ, 04UT0JZ, 04UT3JZ, 04UT4JZ, 04UU0JZ, 04UU3JZ, 04UU4JZ, 04UV0JZ, 04UV3JZ, 04UV4JZ, 04UW0JZ, 04UW3JZ, 04UW4JZ, 04UY0JZ, 04UY3JZ, 04UY4JZ, 04UC0KZ, 04UC3KZ, 04UC4KZ, 04UD0KZ, 04UD3KZ, 04UD4KZ, 04UE0KZ, 04UE3KZ, 04UE4KZ, 04UF0KZ, 04UF3KZ, 04UF4KZ, 04UH0KZ, 04UH3KZ, 04UH4KZ, 04UJ0KZ, 04UJ3KZ, 04UJ4KZ, 04UK0KZ, 04UK3KZ, 04UK4KZ, 04UL0KZ, 04UL3KZ, 04UL4KZ, 04UM0KZ, 04UM3KZ, 04UM4KZ, 04UN0KZ, 04UN3KZ, 04UN4KZ, 04UP0KZ, 04UP3KZ, 04UP4KZ, 04UQ0KZ, 04UQ3KZ, 04UQ4KZ, 04UR0KZ, 04UR3KZ, 04UR4KZ, 04US0KZ, 04US3KZ, 04US4KZ, 04UT0KZ, 04UT3KZ, 04UT4KZ, 04UU0KZ, 04UU3KZ, 04UU4KZ, 04UV0KZ, 04UV3KZ, 04UV4KZ, 04UW0KZ, 04UW3KZ, 04UW4KZ, 04UY0KZ, 04UY3KZ, 04UY4KZ |
| Non-Coronary Vessel Percutaneous Transluminal Mechanical Thrombectomy, or Stents | 39.90                 | 37184, 37185, 37186, 37205, 37206, 37207, 37208 | --                                                                                                                                                                                                                                                                                                                                                                                                                                                                                                                                                                                                                                                                                                                                                                                                                                                                                                                                                                                                                                                                                                                                                                                                                                                                                                                                                                                                                                                                                                                                                                                                                                                                                                                                                                                                                                                                                                                                                                                                                                                                                                                                                                                                                                                                                          |

Prevalent and incident peripheral artery disease was defined by the presence of these Veterans Health Administration, Veterans Health Administration fee-for-service, or Medicare diagnostic and procedural codes in addition to qualifying ankle-brachial indices.  
 CPT, current procedural terminology; ICD, International Classification of Disease.

| <b>eTable 2. Baseline Characteristics of Individuals Excluded From the Study</b> |                                   |                                   |                                    |                                     |                                   |
|----------------------------------------------------------------------------------|-----------------------------------|-----------------------------------|------------------------------------|-------------------------------------|-----------------------------------|
|                                                                                  | Patients, No. (%)                 |                                   |                                    |                                     |                                   |
| Characteristic                                                                   | Men<br>(n = 170,752) <sup>a</sup> | Women<br>(n = 5,430) <sup>b</sup> | Black<br>(n = 35,603) <sup>c</sup> | White<br>(n = 122,631) <sup>d</sup> | Other<br>(n = 9,598) <sup>e</sup> |
| Age, mean (SD), y                                                                | 61.1 (6.3)                        | 57.8 (6.6)                        | 59.9 (6.4)                         | 61.3 (6.2)                          | 60.9 (6.3)                        |
| Male                                                                             | NA                                | NA                                | 33,998 (95.5)                      | 119,306 (97.3)                      | 9,300 (96.9)                      |
| Race/ethnicity                                                                   |                                   |                                   |                                    |                                     |                                   |
| Black                                                                            | 33,998 (20.9)                     | 1,605 (30.7)                      | NA                                 | NA                                  | NA                                |
| White                                                                            | 119,306 (73.4)                    | 3,325 (63.6)                      | NA                                 | NA                                  | NA                                |
| Other <sup>f</sup>                                                               | 9,300 (5.7)                       | 298 (5.7)                         | NA                                 | NA                                  | NA                                |
| Smoking status                                                                   |                                   |                                   |                                    |                                     |                                   |
| Current                                                                          | 93,800 (56.5)                     | 2,594 (49.0)                      | 19,516 (55.8)                      | 68,462 (57.2)                       | 4,193 (45.2)                      |
| Former                                                                           | 41,865 (25.2)                     | 1,007 (19.0)                      | 7,410 (21.2)                       | 31,179 (26.0)                       | 2,599 (28.0)                      |
| Never                                                                            | 30,208 (18.2)                     | 1,698 (32.0)                      | 8,027 (23.0)                       | 20,112 (16.8)                       | 2,491 (26.8)                      |
| Diabetes                                                                         | 90,255 (52.9)                     | 2,244 (41.3)                      | 20,351 (57.2)                      | 62,190 (50.7)                       | 6,170 (64.3)                      |
| Prevalent CVD                                                                    | 87,220 (51.1)                     | 1,862 (34.3)                      | 16,663 (46.8)                      | 63,744 (52.0)                       | 4,841 (50.4)                      |
| Left ankle-brachial index, median (Q1, Q3)                                       | 0.9 (0.6, 1.0)                    | 0.9 (0.7, 1.0)                    | 0.8 (0.6, 1.0)                     | 0.9 (0.6, 1.0)                      | 0.9 (0.7, 1.1)                    |
| Right ankle-brachial index, median (Q1, Q3)                                      | 0.9 (0.7, 1.0)                    | 1.0 (0.7, 1.0)                    | 0.9 (0.7, 1.0)                     | 0.9 (0.7, 1.0)                      | 1.0 (0.7, 1.1)                    |
| SBP, mean (SD), mmHg                                                             | 131.6 (14.3)                      | 129.7 (14.8)                      | 133.3 (14.7)                       | 131.0 (14.1)                        | 131.1 (14.1)                      |
| DBP, mean (SD), mmHg                                                             | 75.8 (8.7)                        | 75.2 (8.8)                        | 77.7 (8.8)                         | 75.2 (8.6)                          | 75.2 (8.7)                        |
| Antihypertensive therapy                                                         | 164,191 (96.2)                    | 5,021 (92.5)                      | 34,454 (96.8)                      | 118,278 (96.5)                      | 9,264 (96.5)                      |
| BMI, mean (SD), kg/m <sup>2</sup>                                                | 29.6 (6.6)                        | 30.3 (7.4)                        | 28.8 (6.4)                         | 29.9 (6.7)                          | 30.1 (6.5)                        |
| Total cholesterol, median (Q1, Q3), mg/dL                                        | 169 (142, 201)                    | 192 (164, 224)                    | 171 (143, 202)                     | 169 (142, 201)                      | 167 (139, 199)                    |
| LDL cholesterol, median (Q1, Q3), mg/dL                                          | 95 (72, 122)                      | 109 (86, 138)                     | 97 (74, 125)                       | 95 (72, 122)                        | 92 (70, 120)                      |
| HDL cholesterol, median (Q1, Q3), mg/dL                                          | 39 (33, 48)                       | 49 (40, 60)                       | 43 (35, 53)                        | 39 (32, 47)                         | 39 (33, 47)                       |
| Triglycerides, median (Q1, Q3), mg/dL                                            | 140 (95, 212)                     | 134 (92, 203)                     | 115 (80, 169)                      | 147 (100, 223)                      | 145 (99, 218)                     |
| Statin therapy                                                                   | 144,879 (84.9)                    | 4,130 (76.1)                      | 29,324 (82.4)                      | 105,647 (86.2)                      | 8,199 (85.4)                      |
| eGFR, mean (SD), mL/min/1.73m <sup>2</sup>                                       | 82.6 (29.4)                       | 80.8 (27.1)                       | 85.0 (33.4)                        | 82.2 (27.3)                         | 79.7 (35.9)                       |

SI conversion factors: To convert LDL and HDL cholesterol to mmol/L, multiply values by 0.0259. To convert triglycerides to mmol/L, multiply by 0.0113.

BMI, body-mass index; CVD, cardiovascular disease; DBP, diastolic blood pressure; eGFR, estimated glomerular filtration rate; HDL, high-density lipoprotein; LDL, low-density lipoprotein; PAD, peripheral artery disease; SBP, systolic blood pressure; SD, standard deviation.

Other race and ethnicity included individuals identified as American Indian or Alaska Native, Asian, or Native Hawaiian or other Pacific Islander, as well as those with Hispanic ethnicity.

a Number missing: 14 (Age); 8,148 (Race/ethnicity); 4,879 (Smoking Status); 88,148 (Left ABI); 80,783 (Right ABI); 5,042 (SBP); 5,042 (DBP); 2,873 (BMI); 6,939 (Total cholesterol); 8,738 (LDL cholesterol); 7,806 (HDL cholesterol); 8,010 (Triglycerides); 2,888 (eGFR)

b Number missing: 1 (Age); 202 (Race/ethnicity); 131 (Smoking Status); 2,921 (Left ABI); 2,591 (Right ABI); 561 (SBP); 561 (DBP); 66 (BMI); 177 (Total cholesterol); 231 (LDL cholesterol); 203 (HDL cholesterol); 217 (Triglycerides); 99 (eGFR)

c Number missing: 6 (Age); 650 (Smoking Status); 18,527 (Left ABI); 16,611 (Right ABI); 1,166 (SBP); 1,166 (DBP); 454 (BMI); 1,319 (Total Cholesterol); 1,736 (LDL Cholesterol); 1,530 (HDL Cholesterol); 1,583 (Triglycerides); 428 (eGFR)

d Number missing: 5 (Age); 2,878 (Smoking Status); 63,579 (Left ABI); 57,979 (Right ABI); 3,096 (SBP); 3,096 (DBP); 1,582 (BMI); 4,259 (Total Cholesterol); 5,365 (LDL Cholesterol); 4,744 (HDL Cholesterol); 4,900 (Triglycerides); 1,740 (eGFR)

e Number missing: 2 (Age); 315 (Smoking Status); 4,771 (Left ABI); 4,803 (Right ABI); 268 (SBP); 268 (DBP); 112 (BMI); 284 (Total Cholesterol); 378 (LDL Cholesterol); 349 (HDL Cholesterol); 346 (Triglycerides); 132 (eGFR)

f Other race and ethnicity included individuals identified as American Indian or Alaska Native, Asian, or Native Hawaiian or other Pacific Islander, as well as those with Hispanic ethnicity.



**eTable 3.** Procedural Codes for Lower-Extremity Amputation Due to Trauma or Non-Peripheral Artery Disease Indications

| Description                              | ICD-9 Codes                                                                                                                                                                                                                                                                                                                                                                                                                                                                                                                                                                                                                                                                                                                                                                                                                                                                                                                                                                                                                                                                                                                                                                                                                                                                                                                                                                                                                                                                                                                                                                                                                                                                                                                                                                                                                                                                                                                                                                                                                                                                                                                                           | ICD-10 Codes                                                                                                                                                                                                                                                                                                                                                                                                                                                                                                                                                                                                                                                                                                                                                                                                                                                                                                                                                                                                                                                                                                                                                                                                                                                                                                                                                                                                                                                                                                                                                                                                                                                                                                                                                                                                                                                                                                                                                      |
|------------------------------------------|-------------------------------------------------------------------------------------------------------------------------------------------------------------------------------------------------------------------------------------------------------------------------------------------------------------------------------------------------------------------------------------------------------------------------------------------------------------------------------------------------------------------------------------------------------------------------------------------------------------------------------------------------------------------------------------------------------------------------------------------------------------------------------------------------------------------------------------------------------------------------------------------------------------------------------------------------------------------------------------------------------------------------------------------------------------------------------------------------------------------------------------------------------------------------------------------------------------------------------------------------------------------------------------------------------------------------------------------------------------------------------------------------------------------------------------------------------------------------------------------------------------------------------------------------------------------------------------------------------------------------------------------------------------------------------------------------------------------------------------------------------------------------------------------------------------------------------------------------------------------------------------------------------------------------------------------------------------------------------------------------------------------------------------------------------------------------------------------------------------------------------------------------------|-------------------------------------------------------------------------------------------------------------------------------------------------------------------------------------------------------------------------------------------------------------------------------------------------------------------------------------------------------------------------------------------------------------------------------------------------------------------------------------------------------------------------------------------------------------------------------------------------------------------------------------------------------------------------------------------------------------------------------------------------------------------------------------------------------------------------------------------------------------------------------------------------------------------------------------------------------------------------------------------------------------------------------------------------------------------------------------------------------------------------------------------------------------------------------------------------------------------------------------------------------------------------------------------------------------------------------------------------------------------------------------------------------------------------------------------------------------------------------------------------------------------------------------------------------------------------------------------------------------------------------------------------------------------------------------------------------------------------------------------------------------------------------------------------------------------------------------------------------------------------------------------------------------------------------------------------------------------|
| Lower Extremity Trauma/Injury and Others | 736.30, 736.31, 736.32, 736.39, 736.4, 736.41, 736.42, 736.5, 736.6, 736.70, 736.71, 736.72, 736.73, 736.74, 736.75, 736.76, 736.79, 736.81, 736.89, 736.9, 735.0, 735.1, 735.2, 735.3, 735.4, 735.5, 735.8, 735.9, 754.30, 754.31, 754.32, 754.33, 754.35, 754.40, 754.41, 754.42, 754.43, 754.44, 754.50, 754.51, 754.52, 754.53, 754.59, 754.60, 754.61, 754.62, 754.69, 754.70, 754.71, 754.79, 755.01, 755.13, 755.14, 755.30, 755.31, 755.32, 755.33, 755.34, 755.35, 755.36, 755.37, 755.38, 755.39, 755.4, 755.60, 755.61, 755.62, 755.63, 755.64, 755.65, 755.66, 755.67, 755.69, 755.8, 759.7, 759.89, 890.0, 890.1, 890.2, 891.0, 891.1, 891.2, 895.0, 895.1, 896.0, 896.1, 896.2, 896.3, 897.0, 897.1, 897.2, 897.3, 897.4, 897.5, 897.6, 897.7, 820.00, 820.01, 820.02, 820.03, 820.09, 820.10, 820.11, 820.12, 820.13, 820.19, 820.20, 820.21, 820.22, 820.30, 820.31, 820.32, 820.8, 820.9, 821.00, 821.01, 821.10, 821.11, 821.20, 821.21, 821.22, 821.23, 821.29, 821.30, 821.31, 821.32, 821.33, 821.39, 822.0, 822.1, 823.00, 823.01, 823.02, 823.10, 823.11, 823.12, 823.20, 823.21, 823.22, 823.30, 823.31, 823.32, 823.40, 823.41, 823.42, 823.80, 823.81, 823.82, 823.90, 823.91, 823.92, 824.0, 824.1, 824.2, 824.3, 824.4, 824.5, 824.6, 824.7, 824.8, 824.9, 825.0, 825.1, 825.20, 825.21, 825.22, 825.23, 825.24, 825.25, 825.29, 825.30, 825.31, 825.32, 825.33, 825.34, 825.35, 825.39, 826.0, 826.1, 827.0, 827.1, 828.0, 828.1, 829.0, 829.1, 835.00, 835.01, 835.02, 835.03, 835.10, 835.11, 835.12, 835.13, 836.0, 836.1, 836.2, 836.3, 836.4, 836.50, 836.51, 836.52, 836.53, 836.54, 836.59, 836.60, 836.61, 836.62, 836.63, 836.64, 836.69, 837.0, 837.1, 838.00, 838.01, 838.02, 838.03, 838.04, 838.05, 838.06, 838.09, 838.10, 838.11, 838.12, 838.13, 838.14, 838.15, 838.16, 838.19, 904.0, 904.1, 904.2, 904.3, 904.40, 904.41, 904.42, 904.50, 904.51, 904.52, 904.53, 904.54, 904.6, 904.7, 904.8, 904.9, 928.00, 928.01, 928.10, 928.11, 928.20, 928.21, 928.3, 928.8, 928.9, 929.0, 929.9, 959.6, 959.7, 996.40, 996.41, 996.42, 996.43, 996.44, 996.45, 996.46, 996.47, 996.49, 996.66, 996.67, 996.78 | M21.959, M21.059, M21.159, M21.859, M21.069, M21.169, M21.869, M21.869, M21.969, M21.549, M21.6X9, M21.6X9, M21.539, M21.6X9, M21.6X9, M21.6X9, M21.769, M21.759, M21.969, M21.80, M21.90, M20.10, M20.30, M20.20, M20.40, M20.40, M20.5X9, M20.5X9, M20.60, Q65.00, Q65.1, Q65.30, Q65.4, Q65.01, Q65.32, Q65.02, Q65.31, Q68.2, Q68.2, Q68.3, Q68.4, Q68.5, Q66.0, Q66.0, Q66.21, Q66.22, Q66.1, Q66.3, Q66.4, Q66.50, Q66.80, Q66.4, Q66.6, Q66.89, Q66.7, Q66.89, Q69.0, Q69.1, Q70.30, Q70.20, Q72.899, Q72.00, Q72.899, Q72.10, Q72.40, Q72.20, Q72.50, Q72.60, Q72.30, Q72.70, Q72.30, Q72.70, Q73.0, Q73.1, Q73.8, Q74.2, Q65.81, Q65.82, Q65.89, Q68.2, Q74.1, Q74.2, Q66.89, Q66.89, Q74.2, Q74.8, Q89.7, E78.71, E78.72, Q87.2, Q87.3, Q87.5, Q87.81, Q87.82, Q87.89, Q89.8, S71.009A, S71.109A, S71.029A, S71.129A, S71.009A, S71.109A, S76.929A, S81.009A, S81.809A, S91.009A, S81.029A, S81.829A, S91.029A, S81.009A, S81.809A, S86.929A, S91.009A, S96.929A, S98.119A, S98.129A, S98.139A, S98.149A, S98.219A, S98.229A, S98.119A, S98.129A, S98.139A, S98.149A, S98.219A, S98.229A, S98.019A, S98.029A, S98.319A, S98.329A, S98.919A, S98.929A, S98.019A, S98.029A, S98.319A, S98.329A, S98.919A, S98.929A, S98.911A, S98.912A, S98.921A, S88.129A, S88.119A, S88.129A, S78.019A, S78.029A, S78.119A, S78.129A, S78.129A, S78.129A, S78.019A, S78.029A, S78.119A, S78.129A, S88.019A, S88.029A, S78.919A, S78.929A, S88.919A, S88.929A, S78.919A, S78.929A, S88.919A, S88.929A, S88.911A, S88.912A, S88.911A, S88.912A, S72.019A, S72.023A, S72.026A, S72.033A, S72.036A, S72.043A, S72.046A, S72.099A, S72.019B, S72.019C, S72.023B, S72.023C, S72.026B, S72.026C, S72.033B, S72.033C, S72.036B, S72.036C, S72.043B, S72.043C, S72.046B, S72.046C, X72.099B, S72.099C, S72.109A, S72.143A, S72.146A, S72.23XA, S72.26XA, S72.109B, S72.109C, S72.143B, S72.143C, S72.146B, S72.146C, S72.23XB, S72.23XC, S72.26XB, S72.26XC, S72.009A, S72.009B, |

| Description | ICD-9 Codes | ICD-10 Codes                                                                                                                                                                                                                                                                                                                                                                                                                                                                                                                                                                                                                                                                                                                                                                                                                                                                                                                                                                                                                                                                                                                                                                                                                                                                                                                                                                                                                                                                                                                                                                                                                                                                                                                                                                                                                                                                                                                                                                                                                                                                                                                                                                                                                           |
|-------------|-------------|----------------------------------------------------------------------------------------------------------------------------------------------------------------------------------------------------------------------------------------------------------------------------------------------------------------------------------------------------------------------------------------------------------------------------------------------------------------------------------------------------------------------------------------------------------------------------------------------------------------------------------------------------------------------------------------------------------------------------------------------------------------------------------------------------------------------------------------------------------------------------------------------------------------------------------------------------------------------------------------------------------------------------------------------------------------------------------------------------------------------------------------------------------------------------------------------------------------------------------------------------------------------------------------------------------------------------------------------------------------------------------------------------------------------------------------------------------------------------------------------------------------------------------------------------------------------------------------------------------------------------------------------------------------------------------------------------------------------------------------------------------------------------------------------------------------------------------------------------------------------------------------------------------------------------------------------------------------------------------------------------------------------------------------------------------------------------------------------------------------------------------------------------------------------------------------------------------------------------------------|
|             |             | S72.009C, S72.90XA, S72.309A, S72.90XB, S72.90XC,<br>S72.309B, S72.309C, S72.409A, S72.413A, S72.416A,<br>S72.443A, S72.446A, S72.453A, S72.456A, S72.499A,<br>S72.409B, S72.409C, S72.413B, S72.413C, S72.416B,<br>S72.416C, S72.443B, S72.443C, S72.446B, S72.446C,<br>S72.453B, S72.453C, S72.456B, S72.456C, S72.499B,<br>S72.499C, S82.009A, S82.009B, S82.009C, S82.109A,<br>S82.839A, S82.101A, S82.831A, S82.102A, S82.832A,<br>S82.109B, S82.109C, S82.839B, S82.839C, S82.101B,<br>S82.831B, S82.102B, S82.832B, S82.209A, S82.409A,<br>S82.201A, S82.401A, S82.202A, S82.402A, S82.209B,<br>S82.209C, S82.409B, S82.409C, S82.201B, S82.401B,<br>S82.202B, S82.402B, S82.169A, S82.319A, S82.819A,<br>S82.829A, OLB00ZZ, OLB03ZZ, OLB04ZZ, OLB10ZZ, OLB13ZZ,<br>OLB14ZZ, OLB20ZZ, OLB23ZZ, OLB24ZZ, OLB30ZZ, OLB33ZZ,<br>OLB34ZZ, OLB40ZZ, OLB43ZZ, OLB44ZZ, OLB50ZZ, OLB53ZZ,<br>OLB54ZZ, OLB60ZZ, OLB63ZZ, OLB64ZZ, OLB90ZZ, OLB93ZZ,<br>OLB94ZZ, OLBBOZZ, OLBBSZZ, OLBBAZZ, OLBBOZZ, OLBBCZZ,<br>OLBC4ZZ, OLBDOZZ, OLBDSZZ, OLBDAZZ, OLBFOZZ, OLBFSZZ,<br>OLBF4ZZ, OLBGOZZ, OLBGSZZ, OLBGAZZ, OLBHOZZ, OLBHSZZ,<br>OLBH4ZZ, OLBJOZZ, OLBJSZZ, OLBJAZZ, OLBK0ZZ, OLBK3ZZ,<br>OLBK4ZZ, OLBLOZZ, OLBL3ZZ, OLBL4ZZ, OLBMOZZ, OLBMSZZ,<br>OLBM4ZZ, OLBNOZZ, OLBNSZZ, OLBNAZZ, OLBPOZZ, OLBPSZZ,<br>OLBP4ZZ, OLBQ0ZZ, OLBQ3ZZ, OLBQ4ZZ, OLBROZZ, OLBRSZZ,<br>OLBR4ZZ, OLSOZZ, OLS3ZZ, OLS4ZZ, OLBTOZZ, OLBTSZZ,<br>OLBT4ZZ, OLBVOZZ, OLBVSZZ, OLBVAZZ, OLBW0ZZ, OLBW3ZZ,<br>OLBW4ZZ, OLT00ZZ, OLT04ZZ, OLT10ZZ, OLT14ZZ, OLT20ZZ,<br>OLT24ZZ, OLT30ZZ, OLT34ZZ, OLT40ZZ, OLT44ZZ, OLT50ZZ,<br>OLT54ZZ, OLT60ZZ, OLT64ZZ, OLT00ZZ, OLT94ZZ, OLTB0ZZ,<br>OLTB4ZZ, OLTC0ZZ, OLTC4ZZ, OLTD0ZZ, OLTD4ZZ, OLTFOZZ,<br>OLTF4ZZ, OLTG0ZZ, OLTG4ZZ, OLTH0ZZ, OLTH4ZZ, OLTJ0ZZ,<br>OLTJ4ZZ, OLTK0ZZ, OLTK4ZZ, OLTL0ZZ, OLTL4ZZ, OLTM0ZZ,<br>OLTM4ZZ, OLTN0ZZ, OLTN4ZZ, OLTP0ZZ, OLTP4ZZ, OLTQ0ZZ,<br>OLTQ4ZZ, OLTR0ZZ, OLTR4ZZ, OLTS0ZZ, OLTS4ZZ, OLTT0ZZ,<br>OLTT4ZZ, OLTVOZZ, OLTV4ZZ, OLTW0ZZ, OLTW4ZZ, S82.201A,<br>S82.401A, S82.201A, S82.401A, S82.202A, S82.402A,<br>S82.201B, S82.201C, S82.401B, S82.401C, S82.201B,<br>S82.401B, S82.202B, S82.402B, S82.53XA, S82.56XA,<br>S82.53XB, S82.53XC, S82.56XB, S82.56XC, S82.63XA, |

| Description | ICD-9 Codes | ICD-10 Codes                                                                                                                                                                                                                                                                                                                                                                                                                                                                                                                                                                                                                                                                                                                                                                                                                                                                                                                                                                                                                                                                                                                                                                                                                                                                                                                                                                                                                                                                                                                                                                                                                                                                                                                                                                                                                                                                                                                                                                                                                                                                                                                                    |
|-------------|-------------|-------------------------------------------------------------------------------------------------------------------------------------------------------------------------------------------------------------------------------------------------------------------------------------------------------------------------------------------------------------------------------------------------------------------------------------------------------------------------------------------------------------------------------------------------------------------------------------------------------------------------------------------------------------------------------------------------------------------------------------------------------------------------------------------------------------------------------------------------------------------------------------------------------------------------------------------------------------------------------------------------------------------------------------------------------------------------------------------------------------------------------------------------------------------------------------------------------------------------------------------------------------------------------------------------------------------------------------------------------------------------------------------------------------------------------------------------------------------------------------------------------------------------------------------------------------------------------------------------------------------------------------------------------------------------------------------------------------------------------------------------------------------------------------------------------------------------------------------------------------------------------------------------------------------------------------------------------------------------------------------------------------------------------------------------------------------------------------------------------------------------------------------------|
|             |             | S82.66XA, S82.63XB, S82.63XC, S82.66XB, S82.66XC,<br>S82.843A, S82.846A, S82.843B, S82.843C, S82.846B,<br>S82.846C, S82.853A, S82.856A, S82.853B, S82.853C,<br>S82.856B, S82.856C, S82.899A, S82.899B, S82.899C,<br>S92.009A, S99.009A, S99.019A, S99.029A, S99.039A,<br>S99.049A, S99.099A, S92.009B, S99.009B, S99.019B,<br>S99.029B, S99.039B, S99.049B, S99.099B, S92.819A,<br>S92.909A, S92.109A, S92.253A, S92.256A, S92.213A,<br>S92.216A, S92.223A, S92.226A, S92.233A, S92.236A,<br>S92.243A, S92.246A, S92.309A, S99.109A, S99.119A,<br>S99.129A, S99.139A, S99.149A, S99.199A, S92.201A,<br>S92.202A, S92.209A, S92.819B, S92.909B, S92.109B,<br>S92.253B, S92.256B, S92.213B, S92.216B, S92.223B,<br>S92.226B, S92.233B, S92.236B, S92.243B, S92.246B,<br>S92.309B, S99.109B, S99.119B, S99.129B, S99.139B,<br>S99.149B, S99.199B, S92.201B, S92.202B, S92.209B,<br>S92.403A, S92.406A, S92.503A, S92.506A, S92.403B,<br>S92.406B, S92.503B, S92.506B, S82.90XA, S82.90XB,<br>S72.91XA, S82.91XA, S72.92XA, S82.92XA, S42.90XA,<br>S52.90XA, S72.90XA, S82.90XA, S22.20XA, S22.49XA,<br>S72.90XA, S82.90XA, T14.8XXA, T14.8XXA, T14.8XXA,<br>S73.006A, S73.016A, S73.026A, S73.036A, S71.009A,<br>S73.016A, S71.009A, S73.026A, S71.009A, S73.036A,<br>S83.219A, S83.249A, S83.289A, S83.209A, S83.30XA,<br>S83.006A, S81.009A, S83.006A, S83.106A, S83.116A,<br>S83.126A, S83.136A, S83.146A, S83.196A, S81.009A,<br>S83.106A, S81.009A, S83.116A, S81.009A, S83.126A,<br>S81.009A, S83.136A, S81.009A, S83.146A, S81.009A,<br>S83.196A, S93.06XA, S91.009A, S93.06XA, S93.306A,<br>S93.316A, S93.316A, S93.326A, S93.336A, S93.129A,<br>S93.119A, S93.106A, S93.336A, S91.309A, S93.306A,<br>S91.309A, S93.316A, S91.309A, S93.316A, S91.309A,<br>S93.326A, S91.309A, S93.336A, S91.309A, S93.129A,<br>S91.109A, S93.119A, S91.109A, S93.336A, S75.009A,<br>S75.009A, S75.109A, S75.209A, S85.309A, S85.409A,<br>S85.009A, S85.509A, S85.009A, S85.509A, S85.109A,<br>S85.139A, S85.809A, S85.169A, S85.809A, S95.109A,<br>S75.809A, S85.809A, S95.809A, S75.909A, S85.909A,<br>S95.902A, T14.90XA, S77.10XA, S77.00XA, S87.80XA, |

| Description                         | ICD-9 Codes                                                                                                                                                                                                                                                                                                                                                                                                                                                                                                                                                                                                                                                                                                                                                                                                                                                                                                                                                                                                                                                                                                                                                                                                                                                                                                                                                                                                                                                                                                                                                                                                                                                                                                                                                                                                                                                                                                                                                                                                                           | ICD-10 Codes                                                                                                                                                                                                                                                                                                                                                                                                                                                                                                                                                                                                                                                                                                                                                                                                                                                                                                                                                                                                                                                                                                                                                                                                                                                                                                                                                                                                                                                                                                                                                                                                                                                                                                                           |
|-------------------------------------|---------------------------------------------------------------------------------------------------------------------------------------------------------------------------------------------------------------------------------------------------------------------------------------------------------------------------------------------------------------------------------------------------------------------------------------------------------------------------------------------------------------------------------------------------------------------------------------------------------------------------------------------------------------------------------------------------------------------------------------------------------------------------------------------------------------------------------------------------------------------------------------------------------------------------------------------------------------------------------------------------------------------------------------------------------------------------------------------------------------------------------------------------------------------------------------------------------------------------------------------------------------------------------------------------------------------------------------------------------------------------------------------------------------------------------------------------------------------------------------------------------------------------------------------------------------------------------------------------------------------------------------------------------------------------------------------------------------------------------------------------------------------------------------------------------------------------------------------------------------------------------------------------------------------------------------------------------------------------------------------------------------------------------------|----------------------------------------------------------------------------------------------------------------------------------------------------------------------------------------------------------------------------------------------------------------------------------------------------------------------------------------------------------------------------------------------------------------------------------------------------------------------------------------------------------------------------------------------------------------------------------------------------------------------------------------------------------------------------------------------------------------------------------------------------------------------------------------------------------------------------------------------------------------------------------------------------------------------------------------------------------------------------------------------------------------------------------------------------------------------------------------------------------------------------------------------------------------------------------------------------------------------------------------------------------------------------------------------------------------------------------------------------------------------------------------------------------------------------------------------------------------------------------------------------------------------------------------------------------------------------------------------------------------------------------------------------------------------------------------------------------------------------------------|
|                                     |                                                                                                                                                                                                                                                                                                                                                                                                                                                                                                                                                                                                                                                                                                                                                                                                                                                                                                                                                                                                                                                                                                                                                                                                                                                                                                                                                                                                                                                                                                                                                                                                                                                                                                                                                                                                                                                                                                                                                                                                                                       | S87.00XA, S97.80XA, S97.00XA, S97.109A, S77.20XA, S77.20XA, S77.20XA, S79.819A, S79.829A, S79.919A, S79.929A, S89.80XA, S89.90XA, S99.819A, S99.919A, T84.498A, T84.039A, T84.029A, T84.019A, M97.9XXA, T84.059A, T84.069A, T84.099A, T84.119A, T84.129A, T84.199A, T84.498A, T84.50XA, T84.60XA, T84.7XXA, T84.81XA, T84.82XA, T84.83XA, T84.84XA, T84.85XA, T84.86XA, T84.89XA, T84.9XXA                                                                                                                                                                                                                                                                                                                                                                                                                                                                                                                                                                                                                                                                                                                                                                                                                                                                                                                                                                                                                                                                                                                                                                                                                                                                                                                                             |
| Amputation with Non-PAD Indications | 170.6, 170.7, 170.8, 170.9, 171.3, 172.7, 173.70, 173.71, 173.72, 173.79, 198.5, 344.1, 711.00, 711.01, 711.02, 711.03, 711.04, 711.05, 711.06, 711.07, 711.08, 711.09, 728.6, 733.20, 733.21, 733.22, 733.29, 736.30, 736.31, 736.32, 736.39, 736.41, 736.42, 736.5, 736.6, 736.70, 736.71, 736.72, 736.73, 736.74, 736.75, 736.76, 736.79, 736.81, 736.89, 736.9, 735.0, 735.1, 735.2, 735.3, 735.4, 735.5, 735.8, 735.9, 754.30, 754.31, 754.32, 754.33, 754.35, 754.40, 754.41, 754.42, 754.43, 754.44, 754.50, 754.51, 754.52, 754.53, 754.59, 754.60, 754.61, 754.62, 754.69, 754.70, 754.71, 754.79, 755.02, 755.13, 755.14, 755.30, 755.31, 755.32, 755.33, 755.34, 755.35, 755.36, 755.37, 755.38, 755.39, 755.4, 755.60, 755.61, 755.62, 755.63, 755.64, 755.65, 755.66, 755.67, 755.69, 755.8, 759.7, 759.89, 890.0, 890.1, 890.2, 891.0, 891.1, 891.2, 895.0, 895.1, 896.0, 896.1, 896.2, 896.3, 897.0, 897.1, 897.2, 897.3, 897.4, 897.5, 897.6, 897.7, 820.00, 820.01, 820.02, 820.03, 820.09, 820.10, 820.11, 820.12, 820.13, 820.19, 820.20, 820.21, 820.22, 820.30, 820.31, 820.32, 820.8, 820.9, 821.00, 821.01, 821.10, 821.11, 821.20, 821.21, 821.22, 821.23, 821.29, 821.30, 821.31, 821.32, 821.33, 821.39, 822.0, 822.1, 823.00, 823.01, 823.02, 823.10, 823.11, 823.12, 823.20, 823.21, 823.22, 823.30, 823.31, 823.32, 823.40, 823.41, 823.42, 823.80, 823.81, 823.82, 823.90, 823.91, 823.92, 824.0, 824.1, 824.2, 824.3, 824.4, 824.5, 824.6, 824.7, 824.8, 824.9, 825.0, 825.1, 825.20, 825.21, 825.22, 825.23, 825.24, 825.25, 825.29, 825.30, 825.31, 825.32, 825.33, 825.34, 825.35, 825.39, 826.0, 826.1, 827.0, 827.1, 828.0, 828.1, 829.0, 829.1, 835.00, 835.01, 835.02, 835.03, 835.10, 835.11, 835.12, 835.13, 836.0, 836.1, 836.2, 836.3, 836.4, 836.50, 836.51, 836.52, 836.53, 836.54, 836.59, 836.60, 836.61, 836.62, 836.63, 836.64, 836.69, 837.0, 837.1, 838.00, 838.01, 838.02, 838.03, 838.04, 838.05, 838.06, 838.09, 838.10, 838.11, 838.12, 838.13, 838.14, 838.15, 838.16, 838.19, | C41.4, C49.20, C40.20, C40.30, C41.9, C43.70, D03.70, D03.71, D03.72, C44.701, C44.711, C44.721, C44.791, C79.51, C79.52, G82.20, M00.00, M00.10, M00.20, M00.80, M00.9, M00.019, M00.119, M00.219, M00.819, M00.029, M00.129, M00.229, M00.829, M00.039, M00.139, M00.239, M00.839, M00.049, M00.149, M00.249, M00.849, M00.059, M00.159, M00.259, M00.859, M00.069, M00.169, M00.269, M00.869, M00.079, M00.179, M00.279, M00.879, M00.08, M00.18, M00.28, M00.88, M00.9, M00.09, M00.19, M00.29, M00.89, M72.0, M85.60, M85.40, M85.50, M85.00, M85.60, M21.959, M21.059, M21.159, M21.859, M21.069, M21.169, M21.869, M21.869, M21.969, M21.549, M21.6X9, M21.6X9, M21.539, M21.6X9, M21.6X9, M21.6X9, M21.759, M21.769, M21.80, M21.969, M21.90, M20.10, M20.30, M20.20, M20.40, M20.40, M20.5X9, M20.5X9, M20.60, Q65.00, Q65.1, Q65.30, Q65.4, Q68.2, Q68.2, Q68.2, Q68.3, Q68.4, Q68.5, Q66.0, Q66.0, Q66.21, Q66.22, Q66.1, Q66.3, Q66.4, Q66.50, Q66.80, Q66.4, Q66.6, Q67.0, Q67.1, Q67.2, Q67.3, Q67.4, Q66.7, Q66.89, Q69.0, Q69.1, Q70.30, Q70.20, Q72.899, Q72.00, Q72.899, Q72.10, Q72.40, Q72.20, Q72.50, Q72.60, Q72.30, Q72.70, Q72.30, Q72.70, Q73.0, Q73.1, Q73.8, Q74.2, Q65.81, Q65.82, Q65.89, Q68.2, Q74.1, Q74.2, Q66.89, Q66.89, Q74.2, Q74.8, Q89.7, E78.71, E78.72, Q87.2, Q87.3, Q87.5, Q87.81, Q87.82, Q87.89, Q89.8, S71.009A, S71.109A, S71.029A, S71.129A, S71.009A, S71.109A, S76.929A, S81.009A, S81.809A, S91.009A, S81.029A, S81.829A, S91.029A, S81.009A, S81.809A, S86.929A, S91.009A, S96.929A, S98.119A, S98.129A, S98.139A, S98.149A, S98.219A, S98.229A, S98.119A, S98.129A, S98.139A, S98.149A, S98.219A, S98.229A, S98.019A, S98.029A, S98.319A, S98.329A, S98.919A, S98.929A, S98.019A, |

| Description | ICD-9 Codes                                                                                                                                                                                                                                                                                                                                   | ICD-10 Codes                                                                                                                                                                                                                                                                                                                                                                                                                                                                                                                                                                                                                                                                                                                                                                                                                                                                                                                                                                                                                                                                                                                                                                                                                                                                                                                                                                                                                                                                                                                                                                                                                                                                                                                                                                                                                                                                                                                                                                                                                                                                                                                                    |
|-------------|-----------------------------------------------------------------------------------------------------------------------------------------------------------------------------------------------------------------------------------------------------------------------------------------------------------------------------------------------|-------------------------------------------------------------------------------------------------------------------------------------------------------------------------------------------------------------------------------------------------------------------------------------------------------------------------------------------------------------------------------------------------------------------------------------------------------------------------------------------------------------------------------------------------------------------------------------------------------------------------------------------------------------------------------------------------------------------------------------------------------------------------------------------------------------------------------------------------------------------------------------------------------------------------------------------------------------------------------------------------------------------------------------------------------------------------------------------------------------------------------------------------------------------------------------------------------------------------------------------------------------------------------------------------------------------------------------------------------------------------------------------------------------------------------------------------------------------------------------------------------------------------------------------------------------------------------------------------------------------------------------------------------------------------------------------------------------------------------------------------------------------------------------------------------------------------------------------------------------------------------------------------------------------------------------------------------------------------------------------------------------------------------------------------------------------------------------------------------------------------------------------------|
|             | 904.0, 904.1, 904.2, 904.3, 904.40, 904.41, 904.42, 904.50,<br>904.51, 904.52, 904.53, 904.54, 904.6, 904.7, 904.8, 904.9,<br>905.4, 928.00, 928.01, 928.10, 928.11, 928.20, 928.21, 928.3,<br>928.8, 928.9, 929.0, 929.9, 959.6, 959.7, 996.40, 996.41, 996.42,<br>996.43, 996.44, 996.45, 996.46, 996.47, 996.49, 996.66, 996.67,<br>996.78 | S98.029A, S98.319A, S98.329A, S98.919A, S98.929A,<br>S98.911A, S98.921A, S98.912A, S98.922A, S98.911A,<br>S98.912A, S88.119A, S88.129A, S88.119A, S88.129A,<br>S78.019A, S78.029A, S78.119A, S78.129A, S78.919A,<br>S78.929A, S88.019A, S88.029A, S78.019A, S78.029A,<br>S78.119A, S78.129A, S88.019A, S88.029A, S78.919A,<br>S78.929A, S88.919A, S88.929A, S78.919A, S78.929A,<br>S88.919A, S88.929A, S88.911A, S88.912A, S88.911A,<br>S88.912A, S72.019A, S72.023A, S72.026A, S72.033A,<br>S72.036A, S72.043A, S72.046A, S72.099A, S72.019B,<br>S72.019C, S72.023B, S72.023C, S72.026B, S72.026C,<br>S72.033B, S72.033C, S72.036B, S72.036C, S72.043B,<br>S72.043C, S72.046B, S72.046C, S72.099B, S72.099C,<br>S72.109A, S72.143A, S72.146A, S72.23XA, S72.26XA,<br>S72.109B, S72.109C, S72.143B, S72.143C, S72.146B,<br>S72.146C, S72.23XB, S72.23XC, S72.26XB, S72.26XC,<br>S72.009A, S72.009B, S72.009C, S72.90XA, S72.309A,<br>S72.90XB, S72.90XC, S72.309B, S72.309C, S72.409A,<br>S72.413A, S72.416A, S72.443A, S72.446A, S72.453A,<br>S72.456A, S72.499A, S72.409B, S72.409C, S72.413B,<br>S72.413C, S72.416B, S72.416C, S72.443B, S72.443C,<br>S72.446B, S72.446C, S72.453B, S72.453C, S72.456B,<br>S72.456C, S72.499B, S72.499C, S82.009A, S82.009B,<br>S82.009C, S82.109A, S82.839A, S82.101A, S82.831A,<br>S82.102A, S82.832A, S82.109B, S82.109C, S82.839B,<br>S82.839C, S82.101B, S82.831B, S82.102B, S82.832B,<br>S82.209A, S82.409A, S82.201A, S82.401A, S82.202A,<br>S82.402A, S82.209B, S82.209C, S82.409B, S82.409C,<br>S82.201B, S82.401B, S82.202B, S82.402B, S82.169A,<br>S82.319A, S82.201A, S82.401A, S82.202A, S82.402A,<br>S82.819A, S82.829A, S82.161A, S82.811A, S82.311A,<br>S82.821A, S82.162A, S82.812A, S82.312A, S82.822A,<br>S82.401A, S82.201A, S82.401A, S82.202A, S82.402A,<br>S82.201B, S82.201C, S82.401B, S82.401C, S82.201B,<br>S82.401B, S82.202B, S82.402B, S82.53XA, S82.56XA,<br>S82.53XB, S82.53XC, S82.56XB, S82.56XC, S82.63XA,<br>S82.66XA, S82.63XB, S82.63XC, S82.66XB, S82.66XC,<br>S82.843A, S82.846A, S82.843B, S82.843C, S82.846B,<br>S82.846C, S82.853A, S82.856A, S82.853B, S82.853C, |

| Description | ICD-9 Codes | ICD-10 Codes                                                                                                                                                                                                                                                                                                                                                                                                                                                                                                                                                                                                                                                                                                                                                                                                                                                                                                                                                                                                                                                                                                                                                                                                                                                                                                                                                                                                                                                                                                                                                                                                                                                                                                                                                                                                                                                                                                                                                                                                                                                                                                                                     |
|-------------|-------------|--------------------------------------------------------------------------------------------------------------------------------------------------------------------------------------------------------------------------------------------------------------------------------------------------------------------------------------------------------------------------------------------------------------------------------------------------------------------------------------------------------------------------------------------------------------------------------------------------------------------------------------------------------------------------------------------------------------------------------------------------------------------------------------------------------------------------------------------------------------------------------------------------------------------------------------------------------------------------------------------------------------------------------------------------------------------------------------------------------------------------------------------------------------------------------------------------------------------------------------------------------------------------------------------------------------------------------------------------------------------------------------------------------------------------------------------------------------------------------------------------------------------------------------------------------------------------------------------------------------------------------------------------------------------------------------------------------------------------------------------------------------------------------------------------------------------------------------------------------------------------------------------------------------------------------------------------------------------------------------------------------------------------------------------------------------------------------------------------------------------------------------------------|
|             |             | S82.856B, S82.856C, S82.899A, S82.899B, S82.899C,<br>S92.009A, S99.009A, S99.019A, S99.029A, S99.039A,<br>S99.049A, S99.099A, S92.009B, S99.009B, S99.019B,<br>S99.029B, S99.039B, S99.049B, S99.099B, S92.819A,<br>S92.909A, S92.109A, S92.253A, S92.256A, S92.213A,<br>S92.216A, S92.223A, S92.226A, S92.233A, S92.236A,<br>S92.243A, S92.246A, S92.309A, S99.109A, S99.119A,<br>S99.129A, S99.139A, S99.149A, S99.199A, S92.201A,<br>S92.202A, S92.209A, S92.819B, S92.909B, S92.109B,<br>S92.253B, S92.256B, S92.213B, S92.216B, S92.223B,<br>S92.226B, S92.233B, S92.236B, S92.243B, S92.246B,<br>S92.309B, S99.109B, S99.119B, S99.129B, S99.139B,<br>S99.149B, S99.199B, S92.201B, S92.202B, S92.209B,<br>S92.403A, S92.406A, S92.503A, S92.506A, S92.403B,<br>S92.406B, S92.503B, S92.506B, S82.90XA, S72.91XA,<br>S82.91XA, S72.92XA, S82.92XA, S42.90XA, S52.90XA,<br>S72.90XA, S82.90XA, S22.20XA, S22.49XA, S72.90XA,<br>S82.90XA, S72.91XA, S82.91XA, S72.92XA, S82.92XA,<br>S42.90XA, S52.90XA, S72.90XA, S82.90XA, S22.20XA,<br>S22.49XA, S72.90XA, S82.90XA, S72.91XE, S82.91XB,<br>S72.92XE, S82.92XB, S42.90XB, S52.90XB, S72.90XE,<br>S82.90XB, S22.20XB, S22.49XB, S72.90XE, S82.90XB,<br>T14.8XXA, T14.8XXA, S73.006A, S73.016A, S73.026A,<br>S73.036A, S71.009A, S73.006A, S71.009A, S73.016A,<br>S71.009A, S73.026A, S71.009A, S73.036A, S83.219A,<br>S83.249A, S83.289A, S83.209A, S83.30XA, S83.006A,<br>S81.009A, S83.006A, S83.106A, S83.116A, S83.126A,<br>S83.136A, S83.146A, S83.196A, S81.009A, S83.106A,<br>S81.009A, S83.116A, S81.009A, S83.126A, S81.009A,<br>S83.136A, S81.009A, S83.146A, S81.009A, S83.196A,<br>S93.06XA, S91.009A, S93.06XA, S93.306A, S93.316A,<br>S93.316A, S93.326A, S93.336A, S93.129A, S93.119A,<br>S93.106A, S93.336A, S91.309A, S93.306A, S91.309A,<br>S93.316A, S91.309A, S93.316A, S91.309A, S93.326A,<br>S91.309A, S93.336A, S91.309A, S93.129A, S91.109A,<br>S93.119A, S91.109A, S93.336A, S75.009A, S75.009A,<br>S75.109A, S753.209A, S85.309A, S85.409A, S85.009A,<br>S85.509A, S85.009A, S85.509A, S85.109A, S85.139A,<br>S85.809A, S85.169A, S85.809A, S95.109A, S75.809A, |

| Description | ICD-9 Codes | ICD-10 Codes                                                                                                                                                                                                                                                                                                                                                                                                                                                                                                                                                                                                                                                                                                |
|-------------|-------------|-------------------------------------------------------------------------------------------------------------------------------------------------------------------------------------------------------------------------------------------------------------------------------------------------------------------------------------------------------------------------------------------------------------------------------------------------------------------------------------------------------------------------------------------------------------------------------------------------------------------------------------------------------------------------------------------------------------|
|             |             | S85.809A, S95.809A, S75.909A, S85.909A, S95.902A,<br>T14.90XA, M84.369S, M84.376S, M84.453S, M84.469S,<br>M84.750S, S79.009S, S82.009S, S82.90XS, S92.819S,<br>S92.909S, S92.919S, S99.209S, S99.219S, S99.229S,<br>S99.239S, S99.249S, S99.299S, S77.10XA, S77.00XA,<br>S87.80XA, S87.00XA, S97.80XA, S97.00XA, S97.109A,<br>S77.20XA, S77.20XA, S77.20XA, S77.20XA, S79.819A,<br>S79.829A, S79.919A, S79.929A, S89.80XA, S89.90XA,<br>S99.819A, S99.919A, T84.498A, T84.039A, T84.029A,<br>T84.019A, M97.9XXA, T84.059A, T84.069A, T84.099A, T84.119,<br>T84.129A, T84.199A, T84.498A, T84.50XA, T84.60XA,<br>T84.7XXA, T84.81XA, T84.82XA, T84.83XA, T84.84XA,<br>T84.85XA, T84.86XA, T84.89XA, T84.9XXA |

Lower extremity amputations not attributed to peripheral artery disease were identified using these Veterans Health Administration, Veterans Health Administration fee-for-service, or Medicare procedural codes.

ICD, International Classification of Disease; PAD, peripheral artery disease.

**eTable 4.** Association of Sex, Race, and Ethnicity With Peripheral Artery Disease Among Individuals Without Diabetes

| Characteristic              | PAD Events/N | Incidence Rate per 1000 PY [95% CI] | Age-Adjusted, Hazard Ratio [95% CI] | Multivariable-Adjusted Hazard Ratio [95% CI] <sup>b</sup> |
|-----------------------------|--------------|-------------------------------------|-------------------------------------|-----------------------------------------------------------|
| Sex                         |              |                                     |                                     |                                                           |
| <i>Male</i>                 | 2,086/33,239 | 14.2 [13.6-14.8]                    | 1.00                                | 1.00                                                      |
| <i>Female</i>               | 43/2,020     | 4.2 [3.1-5.7]                       | 0.33 [0.24-0.44]                    | 0.44 [0.32-0.60]                                          |
| Race/ethnicity <sup>a</sup> |              |                                     |                                     |                                                           |
| <i>Black</i>                | 269/5,373    | 11.2 [9.9-12.6]                     | 0.83 [0.73-0.95]                    | 0.97 [0.85-1.11]                                          |
| <i>White</i>                | 1,623/25,644 | 14.3 [13.6-15.0]                    | 1.00                                | 1.00                                                      |
| <i>Other</i>                | 89/1,634     | 11.9 [9.7-14.7]                     | 0.85 [0.69-1.05]                    | 0.98 [0.79-1.21]                                          |
| <i>Unknown</i>              | 148/2,608    | 12.0 [10.2-14.1]                    | NA                                  | NA                                                        |

Qualifying ankle-brachial index studies were restricted to those performed prior to any lower extremity revascularization or amputation.

ABI, ankle-brachial index; CI, confidence interval; PAD, peripheral artery disease; PY, person-years.

a Incidence rates were calculated using observed (i.e., non-imputed) data; missing values were imputed for calculating hazard ratios. Other race and ethnicity included individuals identified as American Indian or Alaska Native, Asian, or Native Hawaiian or other Pacific Islander, as well as those with Hispanic ethnicity.

b Model includes the following independent variables: sex, race/ethnicity, smoking status, age, SBP, DBP, antihypertensive use, BMI, eGFR, HDL-C, LDL-C, triglycerides, statin usage, and prevalent cardiovascular disease. Missing data were multiply-imputed using predictive mean matching.



**eTable 5.** Association of Sex, Race, and Ethnicity With Peripheral Artery Disease Among Individual Who Never Smoked

| Characteristic              | PAD Events/N | Incidence Rate per 1000 PY [95% CI] | Age-Adjusted, Hazard Ratio [95% CI] | Multivariable-Adjusted Hazard Ratio [95% CI] <sup>b</sup> |
|-----------------------------|--------------|-------------------------------------|-------------------------------------|-----------------------------------------------------------|
| Sex                         |              |                                     |                                     |                                                           |
| <i>Male</i>                 | 853/13,980   | 12.9 [12.1-13.8]                    | 1.00                                | 1.00                                                      |
| <i>Female</i>               | 24/992       | 4.6 [3.1-6.9]                       | 0.38 [0.26-0.58]                    | 0.51 [0.34-0.77]                                          |
| Race/ethnicity <sup>a</sup> |              |                                     |                                     |                                                           |
| <i>Black</i>                | 188/2,981    | 13.5 [11.7-15.5]                    | 1.16 [0.98-1.37]                    | 1.18 [0.99-1.40]                                          |
| <i>White</i>                | 550/9,742    | 12.0 [11.0-13.1]                    | 1.00                                | 1.00                                                      |
| <i>Other</i>                | 81/1,196     | 13.6 [10.9-16.9]                    | 1.18 [0.95-1.46]                    | 1.05 [0.84-1.31]                                          |
| <i>Unknown</i>              | 58/1,053     | 10.7 [8.3-13.9]                     | NA                                  | NA                                                        |

Qualifying ankle-brachial index studies were restricted to those performed prior to any lower extremity revascularization or amputation.

ABI, ankle-brachial index; CI, confidence interval; PAD, peripheral artery disease; PY, person-years.

a Incidence rates were calculated using observed (i.e., non-imputed) data; missing values were imputed for calculating hazard ratios. Other race and ethnicity included individuals identified as American Indian or Alaska Native, Asian, or Native Hawaiian or other Pacific Islander, as well as those with Hispanic ethnicity.

b Model includes the following independent variables: sex, race/ethnicity, diabetes mellitus, age, SBP, DBP, antihypertensive use, BMI, eGFR, HDL-C, LDL-C, triglycerides, statin usage, and prevalent cardiovascular disease. Missing data were multiply-imputed using predictive mean matching.

**eTable 6.** Association of Sex, Race, and Ethnicity With Peripheral Artery Disease Among Individuals Without Diabetes Who Never Smoked

| Characteristic    | PAD Events/N         | Incidence Rate per 1000 PY [95% CI] | Age-Adjusted, Hazard Ratio [95% CI] | Multivariable-Adjusted Hazard Ratio [95% CI] <sup>c</sup> |
|-------------------|----------------------|-------------------------------------|-------------------------------------|-----------------------------------------------------------|
| Sex               |                      |                                     |                                     |                                                           |
| <i>Male</i>       | 128/5,481            | 5.3 [4.4-6.3]                       | 1.00                                | 1.00                                                      |
| <i>Female</i>     | <10/632 <sup>b</sup> | 2.1 [1.0-4.5]                       | 0.50 [0.23-1.08]                    | 0.58 [0.26-1.30]                                          |
| Race <sup>a</sup> |                      |                                     |                                     |                                                           |
| <i>Black</i>      | 20/1,084             | 4.2 [2.7-6.4]                       | 1.02 [0.66-1.58]                    | 1.14 [0.73-1.79]                                          |
| <i>White</i>      | 93/4,155             | 5.0 [4.1-6.2]                       | 1.00                                | 1.00                                                      |
| <i>Other</i>      | <10/404 <sup>b</sup> | 4.3 [2.2-8.7]                       | 1.22 [0.67-2.22]                    | 1.21 [0.66-2.19]                                          |
| <i>Unknown</i>    | 14/470               | 5.8 [3.4-9.7]                       | NA                                  | NA                                                        |

Qualifying ankle-brachial index studies were restricted to those performed prior to any lower extremity revascularization or amputation.

ABI, ankle-brachial index; CI, confidence interval; PAD, peripheral artery disease; PY, person-years.

a Incidence rates were calculated using observed (i.e., non-imputed) data; missing values were imputed for calculating hazard ratios. Other race and ethnicity included individuals identified as American Indian or Alaska Native, Asian, or Native Hawaiian or other Pacific Islander, as well as those with Hispanic ethnicity.

b Privacy rules for Medicare data require counts less than 10 be reported as “<10” rather than discrete counts.

c Model includes the following independent variables: sex, race/ethnicity, age, SBP, DBP, antihypertensive use, BMI, eGFR, HDL-C, LDL-C, triglycerides, statin usage, and prevalent cardiovascular disease. Missing data were multiply-imputed using predictive mean matching.

**eTable 7. Baseline Characteristics of Individuals Without Diabetes Who Never Smoked**

| Characteristic                              | Patients, No. (%)               |                                 |                                   |                                   |                                 |
|---------------------------------------------|---------------------------------|---------------------------------|-----------------------------------|-----------------------------------|---------------------------------|
|                                             | Men<br>(n = 5,481) <sup>a</sup> | Women<br>(n = 632) <sup>b</sup> | Black<br>(n = 1,084) <sup>c</sup> | White<br>(n = 4,155) <sup>d</sup> | Other<br>(n = 404) <sup>e</sup> |
| Age, mean (SD), y                           | 60.4 (6.5)                      | 55.5 (6.8)                      | 57.4 (6.7)                        | 60.7 (6.4)                        | 59.0 (6.7)                      |
| Male                                        | NA                              | NA                              | 906 (83.6)                        | 3,789 (91.2)                      | 372 (92.1)                      |
| Race/ethnicity                              |                                 |                                 |                                   |                                   |                                 |
| Black                                       | 906 (17.9)                      | 178 (30.9)                      | NA                                | NA                                | NA                              |
| White                                       | 3,789 (74.8)                    | 366 (63.5)                      | NA                                | NA                                | NA                              |
| Other <sup>f</sup>                          | 372 (7.3)                       | 32 (5.6)                        | NA                                | NA                                | NA                              |
| Prevalent CVD                               | 1,689 (30.8)                    | 92 (14.6)                       | 290 (26.8)                        | 1,270 (30.6)                      | 107 (26.5)                      |
| Left ankle-brachial index, median (Q1, Q3)  | 1.1 (1.0, 1.2)                  | 1.1 (1.0, 1.2)                  | 1.1 (1.0, 1.2)                    | 1.1 (1.0, 1.2)                    | 1.1 (1.0, 1.2)                  |
| Right ankle-brachial index, median (Q1, Q3) | 1.1 (1.0, 1.2)                  | 1.1 (1.0, 1.2)                  | 1.1 (1.0, 1.2)                    | 1.1 (1.0, 1.2)                    | 1.1 (1.0, 1.2)                  |
| SBP, mean (SD), mmHg                        | 128.8 (12.3)                    | 126.3 (13.6)                    | 129.4 (12.9)                      | 128.3 (12.2)                      | 128.5 (12.1)                    |
| DBP, mean (SD), mmHg                        | 77.8 (8.1)                      | 75.7 (8.2)                      | 78.9 (8.5)                        | 77.2 (8.0)                        | 78.1 (8.3)                      |
| Antihypertensive therapy                    | 4,994 (91.1)                    | 527 (83.4)                      | 994 (91.7)                        | 3,772 (90.8)                      | 366 (90.6)                      |
| BMI, mean (SD), kg/m <sup>2</sup>           | 31.2 (6.5)                      | 30.7 (7.2)                      | 31.0 (6.6)                        | 31.2 (6.6)                        | 30.7 (5.7)                      |
| Total cholesterol, median (Q1, Q3), mg/dL   | 177 (153, 204)                  | 195 (171, 222)                  | 179 (157, 205)                    | 177 (153, 206)                    | 185 (158, 211)                  |
| LDL cholesterol, median (Q1, Q3), mg/dL     | 105 (83, 129)                   | 115 (92, 137)                   | 106 (86, 132)                     | 105 (83, 129)                     | 108 (86, 134)                   |
| HDL cholesterol, median (Q1, Q3), mg/dL     | 43 (36, 52)                     | 55 (46, 67)                     | 48 (40, 58)                       | 43 (36, 52)                       | 43 (35, 52)                     |
| Triglycerides, median (Q1, Q3), mg/dL       | 119 (83, 175)                   | 106 (73, 148)                   | 93 (68, 138)                      | 123 (86, 179)                     | 132 (93, 196)                   |
| Statin therapy                              | 3,732 (68.1)                    | 340 (53.8)                      | 679 (62.6)                        | 2,847 (68.5)                      | 274 (67.8)                      |
| eGFR, mean (SD), mL/min/1.73m <sup>2</sup>  | 86.4 (24.4)                     | 84.7 (20.7)                     | 90.3 (27.6)                       | 85.3 (23.1)                       | 86.9 (21.9)                     |

SI conversion factors: To convert LDL and HDL cholesterol to mmol/L, multiply values by 0.0259. To convert triglycerides to mmol/L, multiply by 0.0113.

BMI, body-mass index; CVD, cardiovascular disease; DBP, diastolic blood pressure; eGFR, estimated glomerular filtration rate; HDL, high-density lipoprotein; LDL, low-density lipoprotein; PAD, peripheral artery disease; SBP, systolic blood pressure; SD, standard deviation.

a Number missing: 414 (Race/ethnicity); 131 (SBP); 131 (DBP); 61 (BMI); 166 (Total cholesterol); 208 (LDL cholesterol); 200 (HDL cholesterol); 206 (Triglycerides); 81 (eGFR)

b Number missing: 56 (Race/ethnicity); 64 (SBP); 64 (DBP); 13 (BMI); 21 (Total cholesterol); 28 (LDL cholesterol); 27 (HDL cholesterol); 25 (Triglycerides); 15 (eGFR)

c Number missing: 35 (SBP); 35 (DBP); 9 (BMI); 31 (Total Cholesterol); 47 (LDL Cholesterol); 41 (HDL Cholesterol); 37 (Triglycerides); 9 (eGFR)

d Number missing: 113 (SBP); 113 (DBP); 40 (BMI); 108 (Total Cholesterol); 128 (LDL Cholesterol); 125 (HDL Cholesterol); 132 (Triglycerides); 60 (eGFR)

e Number missing: 13 (SBP); 13 (DBP); 7 (BMI); 19 (Total Cholesterol); 20 (LDL Cholesterol); 20 (HDL Cholesterol); 21 (Triglycerides); 7 (eGFR)

f Other race and ethnicity included individuals identified as American Indian or Alaska Native, Asian, or Native Hawaiian or other Pacific Islander, as well as those with Hispanic ethnicity.

**eTable 8.** Deaths During Follow-up by Sex, Race and Ethnicity, Diabetes, and Smoking

| <b>Characteristic</b>    | <b>Deaths/N (%)</b>  |
|--------------------------|----------------------|
| Sex                      |                      |
| <i>Male</i>              | 10,870/73,870 (14.7) |
| <i>Female</i>            | 208/3,219 (6.5)      |
| Race/ethnicity           |                      |
| <i>Black</i>             | 1,659/13,080 (12.7)  |
| <i>White</i>             | 7,543/54,377 (13.9)  |
| <i>Other<sup>a</sup></i> | 532/4,454 (11.9)     |
| Diabetes Mellitus        |                      |
| <i>Absent</i>            | 4,412/35,259 (12.5)  |
| <i>Present</i>           | 6,666/41,782 (16.0)  |
| Smoking Status           |                      |
| <i>Never</i>             | 1,523/14,972 (10.2)  |
| <i>Former</i>            | 2,271/18,348 (12.4)  |
| <i>Current</i>           | 5,237/29,263 (17.9)  |

<sup>a</sup> Other race and ethnicity included individuals identified as American Indian or Alaska Native, Asian, or Native Hawaiian or other Pacific Islander, as well as those with Hispanic ethnicity.

**eTable 9.** Association of Sex, Race and Ethnicity, Diabetes, and Smoking With Subsequent Ankle-Brachial Index Less Than 0.90

| Characteristic                | PAD Events/N | Incidence Rate per 1000 PY [95% CI] | Age-Adjusted, Hazard Ratio [95% CI] | Multivariable-Adjusted Hazard Ratio [95% CI] <sup>a</sup> |
|-------------------------------|--------------|-------------------------------------|-------------------------------------|-----------------------------------------------------------|
| Sex                           |              |                                     |                                     |                                                           |
| <i>Male</i>                   | 4,454/73,822 | 12.7 [12.4-13.1]                    | 1.00                                | 1.00                                                      |
| <i>Female</i>                 | 82/3,219     | 4.9 [4.0-6.1]                       | 0.42 [0.34-0.53]                    | 0.54 [0.43-0.67]                                          |
| Race/ethnicity <sup>b,c</sup> |              |                                     |                                     |                                                           |
| <i>Black</i>                  | 737/13,080   | 11.8 [11.0-12.7]                    | 0.96 [0.88-1.04]                    | 1.04 [0.95-1.13]                                          |
| <i>White</i>                  | 3,327/54,377 | 12.9 [12.5-13.4]                    | 1.00                                | 1.00                                                      |
| <i>Other</i>                  | 225/4,454    | 10.2 [9.0-11.6]                     | 0.80 [0.70-0.92]                    | 0.86 [0.75-0.99]                                          |
| <i>Unknown</i>                | 247/5,130    | 10.0 [8.8-11.3]                     | NA                                  | NA                                                        |
| Diabetes Mellitus             |              |                                     |                                     |                                                           |
| <i>Absent</i>                 | 1,683/35,259 | 10.6 [10.1-11.1]                    | 1.00                                | 1.00                                                      |
| <i>Present</i>                | 2,853/41,782 | 13.7 [13.3-14.3]                    | 1.29 [1.21-1.37]                    | 1.31 [1.22-1.40]                                          |
| Smoking Status <sup>b</sup>   |              |                                     |                                     |                                                           |
| <i>Never</i>                  | 448/14,972   | 6.2 [5.6-6.8]                       | 1.00                                | 1.00                                                      |
| <i>Former</i>                 | 899/18,348   | 10.9 [10.2-11.6]                    | 1.59 [1.42-1.78]                    | 1.47 [1.31-1.64]                                          |
| <i>Current</i>                | 2,448/29,263 | 17.1 [16.5-17.8]                    | 2.68 [2.42-2.95]                    | 2.27 [2.05-2.51]                                          |
| <i>Unknown</i>                | 741/14,458   | 10.8 [10.1-11.7]                    | NA                                  | NA                                                        |

Qualifying ankle-brachial index studies were restricted to those performed prior to any lower extremity revascularization or amputation.

ABI, ankle-brachial index; CI, confidence interval; PAD, peripheral artery disease; PY, person-years.

a Model includes the following independent variables: sex, race/ethnicity, diabetes mellitus, smoking status, age, SBP, DBP, antihypertensive use, BMI, eGFR, HDL-C, LDL-C, triglycerides, statin usage, and prevalent cardiovascular disease. Missing data were multiply-imputed using predictive mean matching.

b Incidence rates were calculated using observed (i.e., non-imputed) data; missing values were imputed for calculating hazard ratios.

c Other race and ethnicity included individuals identified as American Indian or Alaska Native, Asian, or Native Hawaiian or other Pacific Islander, as well as those with Hispanic ethnicity.

**eFigure 1. Sample Derivation**

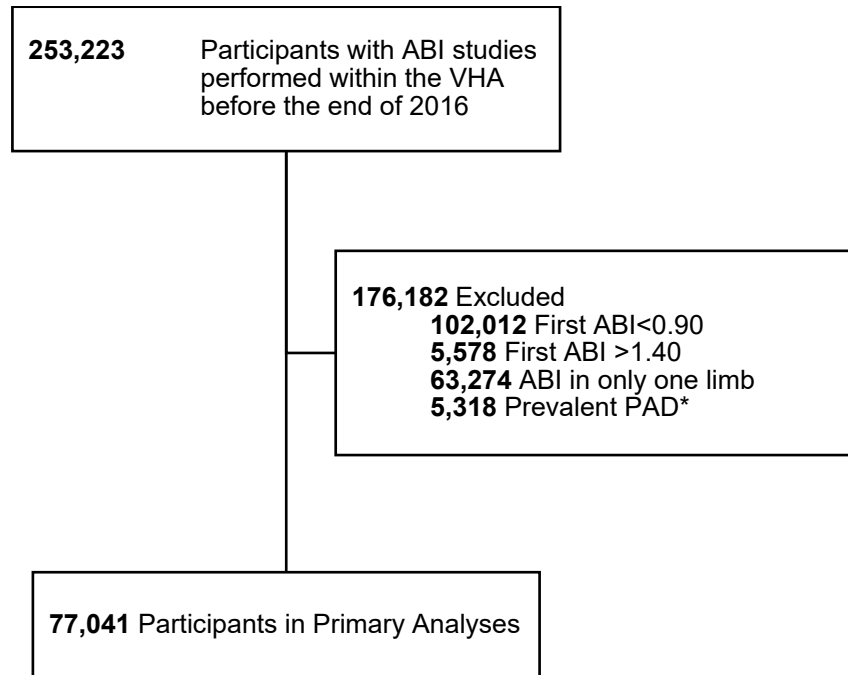

The study population was selected from individuals with ankle-brachial index studies performed within the Veterans Health Administration healthcare system without prevalent peripheral artery disease at baseline.

ABI, ankle-brachial index; PAD, peripheral artery disease; VHA, Veterans Health Administration.

\*Based on International Classification of Disease-9/10 and current procedural terminology codes

**eFigure 2.** Cumulative Incidence of Peripheral Artery Disease by Smoking History

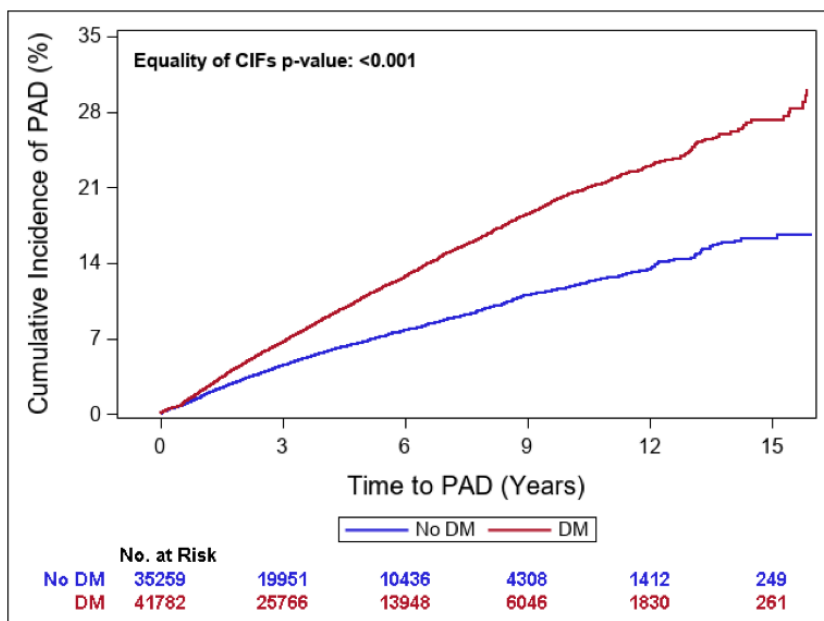

Cumulative incidence of peripheral artery disease stratified by history of diabetes mellitus. Incident peripheral artery disease was defined by ankle-brachial index <0.90, non-traumatic amputation, or surgical or percutaneous lower extremity arterial revascularization.  
 CIF, cumulative incidence function.

**eFigure 3.** Cumulative Incidence of Peripheral Artery Disease by Smoking History

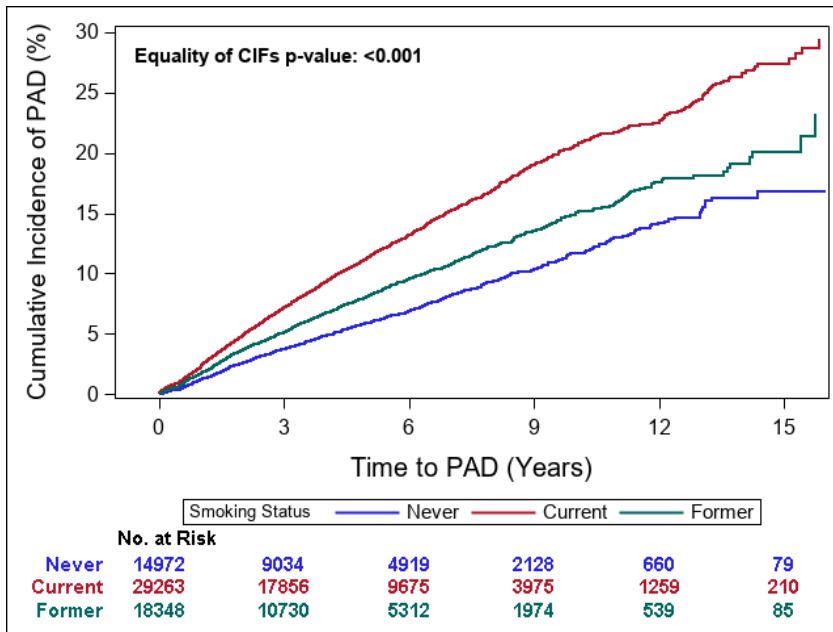

Cumulative incidence of peripheral artery disease stratified by smoking history. Incident peripheral artery disease was defined by ankle-brachial index <0.90, non-traumatic amputation, or surgical or percutaneous lower extremity arterial revascularization. CIF, cumulative incidence function.



### eFigure 4. Distribution of Time to Incident Peripheral Artery Disease by Race

Histogram depicting distribution of time from baseline to (A) overall incident peripheral artery disease, (B) lower extremity revascularization, (C) non-traumatic lower extremity amputation, and (D) subsequent ankle-brachial index <0.90 stratified by race.

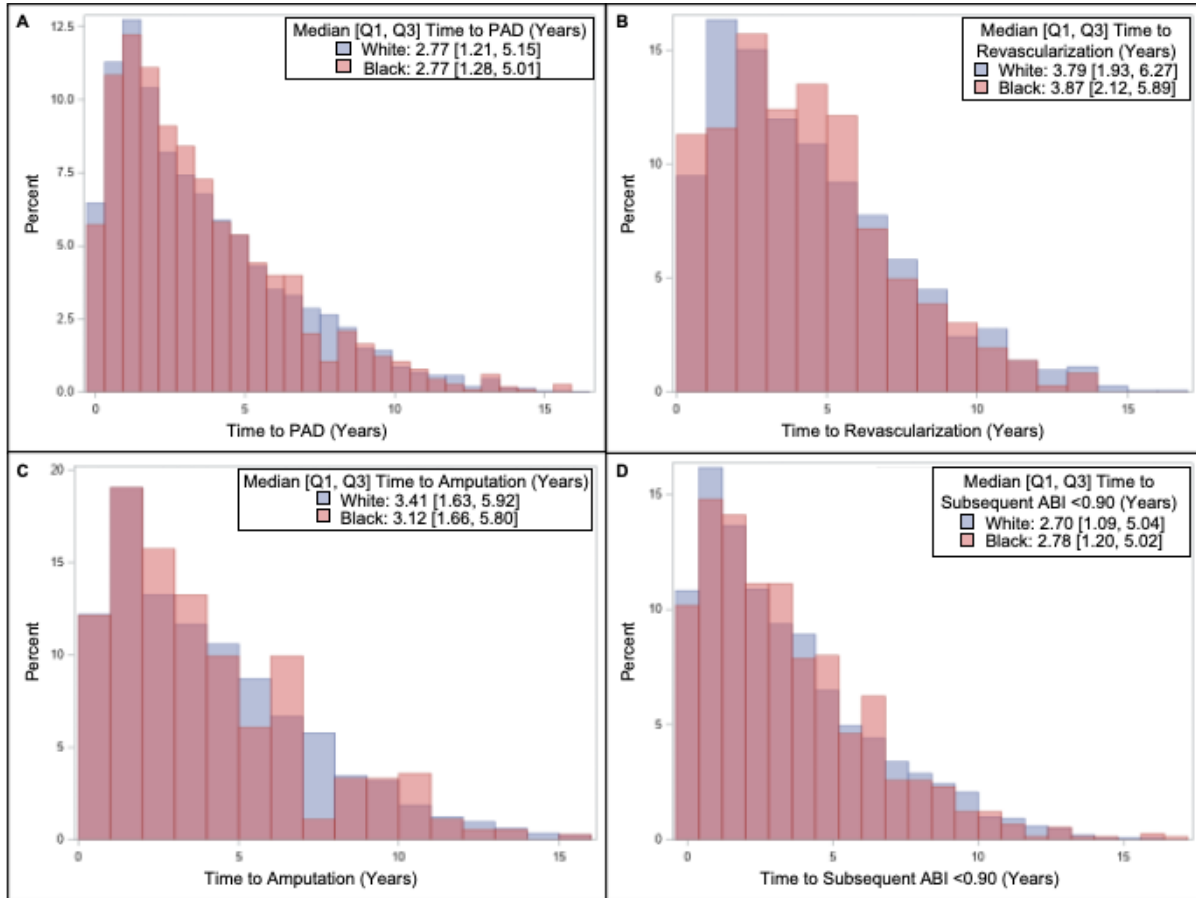

The legend also includes median and interquartile range of time to each endpoint. Analyses are limited to individuals who developed each incident outcome.
